# Supplementary material for: N-Formylation of amines utilizing CO2by a heterogeneous metal–organic framework supported single-site cobalt catalyst
Source: Royal Society of Chemistry journal article supplement (doi:10.1039/d2cy01231f), 2022-01-01
Supplement: d2cy01231f1.pdf [file d2cy01231f1.pdf]

## Supporting Information

### **N-Formylation of Amines Utilizing CO<sub>2</sub> by a Heterogeneous Metal-Organic Framework Supported Single-Site Cobalt Catalyst**

Rajashree Newar, Rahul Kalita, Naved Akhtar, Neha Antil, Manav Chauhan, Kuntal Manna\*

Department of Chemistry, Indian Institute of Technology Delhi, Hauz Khas, New Delhi 110016, India

\*Email: kmanna@chemistry.iitd.ac.in

### Table of contents

|                                                                 |                |
|-----------------------------------------------------------------|----------------|
| <b>1. General experiment</b>                                    | <b>S2</b>      |
| <b>2. Synthesis and characterization of DUT-5 and DUT-5-CoH</b> | <b>S2-S3</b>   |
| <b>3. DUT-5-CoH catalysed <i>N</i>-formylation of amines</b>    | <b>S4-S13</b>  |
| <b>4. Kinetics study for <i>N</i>-formylation of amines</b>     | <b>S13-S15</b> |
| <b>5. GC-MS analysis of the products</b>                        | <b>S15-S17</b> |
| <b>6. Comparison of catalytic activity of DUT-5-CoH</b>         | <b>S18-S19</b> |
| <b>7. Characterization of the products</b>                      | <b>S20-S26</b> |
| <b>8. DFT calculations</b>                                      | <b>S27-S31</b> |
| <b>9. EXAFS and XPS analysis</b>                                | <b>S31-S33</b> |
| <b>10. References</b>                                           | <b>S33-S34</b> |

**1. General Experiment.** All experiments were performed under passive conditions inside the glovebox, except for any case to be displayed. All solvents were purchased from Finar and used without further purification. Tetrahydrofuran, and toluene were dried with calcium hydride followed by distillation on Na/benzophenone. All reagents and substrates are commercially available and used directly as received. 4,4-biphenyldicarboxylic acid was purchased from Alfa Aesar, and  $\text{AlCl}_3 \cdot 6\text{H}_2\text{O}$  was purchased from Sigma Aldrich.  $^1\text{H}$  NMR spectra were recorded on a Bruker NMR 500 DRX spectrometer at 500 MHz and referenced to the proton resonance resulting from incomplete deuteration of the deuterated water ( $\delta$  4.79). Thermogravimetric analysis (TGA) was performed on a PerkinElmer TGA7 system on well-ground samples in a flowing nitrogen atmosphere with a heating rate of  $10\text{ }^\circ\text{C}/\text{min}$  with a range of  $40\text{-}800\text{ }^\circ\text{C}$ . Room temperature powder X-ray diffraction data were collected on a Bruker Advance diffractometer using Ni-filtered  $\text{Cu K}\alpha$  radiation ( $\lambda = 1.5406\text{ \AA}$ ). Data were collected with a step size of  $0.05^\circ$  and at a count time of 1s per step over the range  $4^\circ < 2\theta < 70^\circ$ . The experimental and calculated PXRD patterns are in good agreement indicating the monophasic nature of the bulk samples. Samples were dried at room temperature for powder X-ray diffraction measurement. The liquid phase of catalytic reactions was determined by gas chromatography (GC) using Agilent 7890B gas chromatograph equipped with a flame ionization detector (FID) and mass detector (Agilent 5977B GC/MSD). GC-MS conditions: Inj:  $220\text{ }^\circ\text{C}$ ; Det:  $250\text{ }^\circ\text{C}$ ; Column temp:  $80\text{ }^\circ\text{C}$  followed by a ramp of  $5\text{ }^\circ\text{C}/\text{min}$  to  $220\text{ }^\circ\text{C}$ ; Column flow:  $1.0\text{ mL}/\text{min}$ . Samples were diluted in a 5%  $\text{HNO}_3$  matrix and analyzed with a six-point standard curve over the range from 0.1 ppm to 20 ppm. The correlation coefficient was  $> 0.9990$  for all analytes of interest. All the N-formylation reactions were performed using 100 mL Parr pressure vessels (4793 (VGR)-T-SS-3000-DVD). The vessel was pressurized directly from a  $\text{H}_2$  gas tank and a  $\text{CO}_2$  gas tank using a gauge (0-3000 psi displayed, 0-200 bar). To analyse the chemical state of transition elements, XPS was recorded on an X-ray photoelectron spectrometer, PHI 5000 VersaProbe III using  $\text{Al-K}\alpha$  ( $h\nu = 1486.6\text{ eV}$ ) X-ray source. MOF samples were vacuum dried at room temperature, and then powder samples were measured ultra-high vacuum environment.

**2. Synthesis and characterization of DUT-5-CoH.** DUT-5-CoH was synthesized according to the reported procedure.<sup>1</sup> A solvothermal reaction between 4,4'-biphenyldicarboxylic acid and aluminum chloride hexahydrate in DMF at  $120\text{ }^\circ\text{C}$  for 48 h resulted DUT-5-MOF as a white crystalline solid. The post-synthetic modification of the SBUs of the DUT-5-MOF was performed via deprotonation of its  $\mu_2\text{-OH}$  by *n*-BuLi followed by the addition of THF solution

of  $\text{CoCl}_2$  to afford the cobalt functionalized DUT-5 MOF (DUT-5- $\text{CoCl}$ ). The DUT-5- $\text{CoCl}$  MOF was further treated with  $\text{NaEt}_3\text{BH}$  to give DUT-5- $\text{CoH}$  MOF via halide-hydride exchange reaction (Fig. S1).

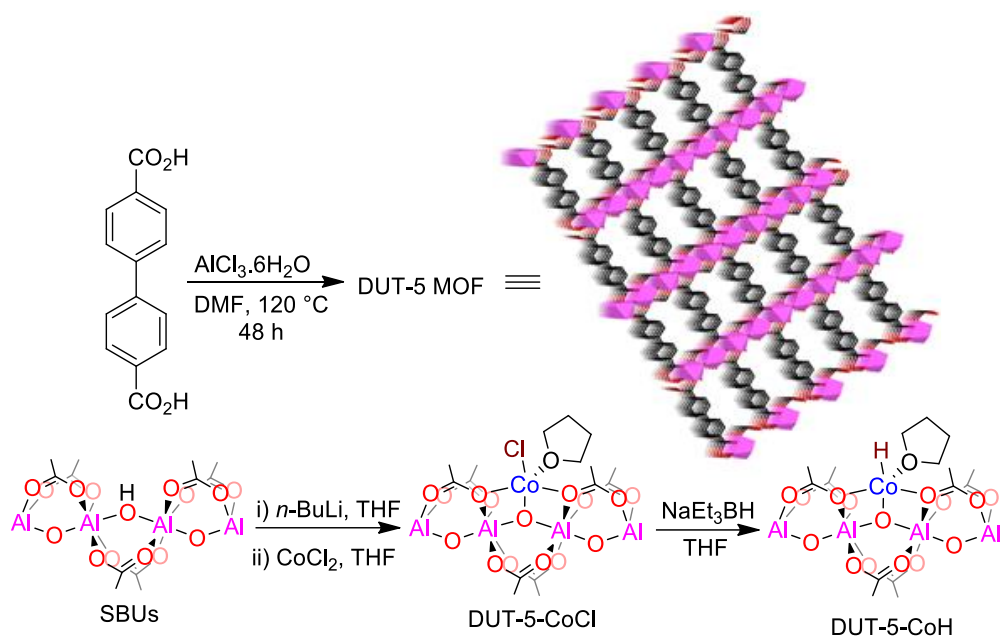

**Figure S1.** Synthesis of DUT-5- $\text{CoH}$  via post-synthetic metalation of SBUs of DUT-5 MOF.

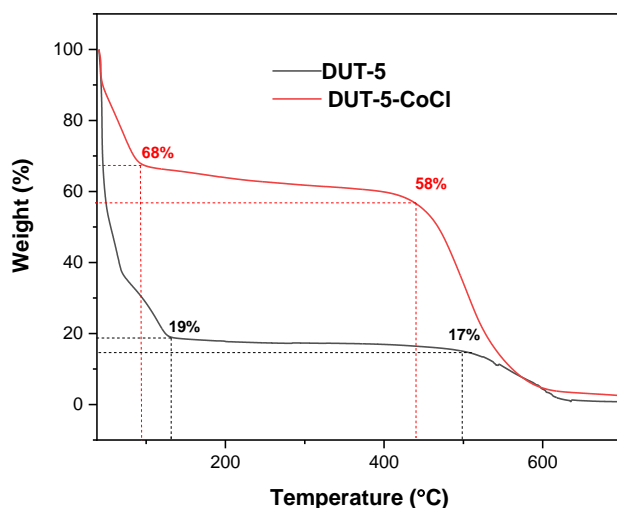

**Figure S2.** TGA curve of freshly prepared DUT-5 (black) and DUT-5- $\text{CoCl}$  (red). A solvent weight loss of 81% and 32% was observed in the room temperature to  $40\text{ }^\circ\text{C}$  to  $200\text{ }^\circ\text{C}$  range, respectively.

### 3. DUT-5-CoH catalysed *N*-formylation of amines using phenyl silane.

**3.1. General procedure for DUT-5-CoH catalysed *N*-formylation of amines using phenyl silane.** DUT-5-CoH (0.5 mol% of Co) in 3 ml of THF was transferred into a 50 mL glass liner in a glovebox. The amine substrate and phenyl silane were added to the mixture. Then, the liner was fitted in a Parr reactor and sealed. The sealed Parr reactor was taken out from the glovebox and purged it with CO<sub>2</sub> gas two times. The Parr reactor was pressurized to 10 bar CO<sub>2</sub> and stirred at 25 °C or heating at 100 °C for 20-40 h. After the completion of the reaction, the pressure of the reactor was released. The solid MOF was removed from suspension inside the glove box, washed with THF three times and reused. The combined organic extracts were concentrated in vacuo to yield corresponding *N*-formaldehyde as the pure product.

### 3.2. A Typical procedure for DUT-5-CoH catalysed *N*-formylation of *p*-methoxy benzylamine.

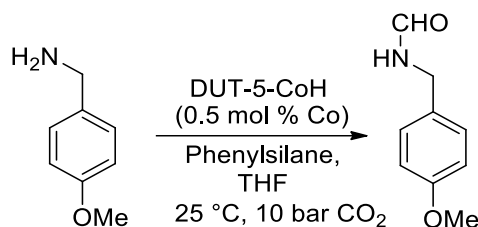

DUT-5-CoH (0.5 mol% of Co) in 3 ml of THF was transferred into a 50 mL glass liner in a glovebox. To the mixture, *p*-methoxy benzylamine (49  $\mu$ L, 0.375 mmol) and 106  $\mu$ L Phenyl silane were added. Then, the liner was fitted in a Parr reactor and sealed. The sealed Parr reactor was taken out from the glovebox and purged it with CO<sub>2</sub> gas two times. The Parr reactor was pressurized to 10 bar CO<sub>2</sub> and stirred at room temperature for 20 h. After the completion of the reaction, the pressure of the reactor was released. The solid MOF was removed from suspension inside the glove box, washed with THF multiple times, and reused. The combined organic extracts were concentrated in vacuo, followed by column chromatography using hexane and ethyl acetate (50:1, R<sub>f</sub>: 0.6) as an eluent to yield *N*-(4-methoxybenzyl)formamide as the pure product (0.050 g, 0.335 mmol, 90%).

**Table S1. Optimization reaction conditions for the *N*-formylation of *p*-methoxy benzylamine.<sup>a</sup>**

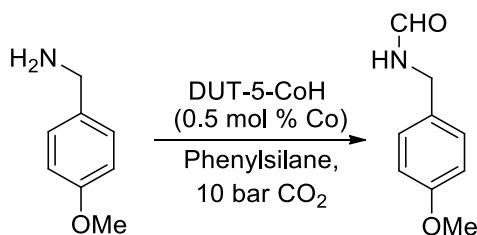

| Entry no. | Catalyst                    | Reductant                          | Temperature (°C) | Time (h)    | Solvent    | GC-Yield (%) |
|-----------|-----------------------------|------------------------------------|------------------|-------------|------------|--------------|
| 1         | DUT-5-CoH (0.5 mol%)        | Phenylsilane (2 eq)                | 25               | 24 h        | THF        | 80           |
| 2         | DUT-5-CoH (0.5 mol%)        | H <sub>2</sub> (10 bar)            | 25               | 24 h        | THF        | 0            |
| 3         | DUT-5-CoH (0.5 mol%)        | Phenylsilane (1 eq)                | 25               | 24 h        | THF        | 50           |
| 4         | DUT-5-CoH (0.5 mol%)        | Phenylsilane (2 eq)                | 25               | 24 h        | Toluene    | 63           |
| <b>5</b>  | <b>DUT-5-CoH (0.5 mol%)</b> | <b>Phenylsilane (2.3 eq)</b>       | <b>25</b>        | <b>20 h</b> | <b>THF</b> | <b>90</b>    |
| 6         | DUT-5-CoH (0.1 mol%)        | Phenylsilane (2.3 eq)              | 25               | 72 h        | THF        | 81           |
| 7         | DUT-5-CoH (0.5 mol%)        | Phenylsilane (2.3 eq)              | 25               | 6 h         | THF        | 55           |
| 8         | DUT-5-CoH (0.5 mol%)        | diethoxymethylsilane (2.3 eq)      | 25               | 20 h        | THF        | 0            |
| 9         | DUT-5-CoH (0.5 mol%)        | Poly(methylhydrosiloxane) (2.3 eq) | 25-100           | 20 h        | THF        | 0            |
| 10        | No MOF catalyst             | Phenylsilane (2.3 eq)              | 25               | 20 h        | THF        | 3            |

<sup>a</sup>Reaction conditions: DUT-5-CoH, 10 bar CO<sub>2</sub>, 3.0 mL solvent.

### 3.3. General procedure DUT-5-CoH catalyzed *N*-formylation of amines using H<sub>2</sub>.

DUT-5-CoH (0.5 mol% of Co) in 3 ml of THF was transferred into a 50 mL glass liner in a glovebox. The amine substrate was added to the mixture. Then, the liner was fitted in a Parr reactor and sealed. The sealed Parr reactor was taken out from the glovebox and purged it with CO<sub>2</sub> gas two times. The Parr reactor was pressurized to 10 bar CO<sub>2</sub> followed by 10 bar of H<sub>2</sub> and heated at 100 °C for 40 h. After the successful completion of the reaction, the reactor was cooled to room temperature, and the pressure was released. The solid MOF was removed from suspension inside the glove box, washed with THF three times and reused. The combined organic extracts were concentrated in vacuo to yield corresponding *N*-formaldehyde as the pure product.

### 3.4. Typical procedure for the DUT-5-CoH catalyzed *N*-formylation of *o*-anisidine using H<sub>2</sub>.

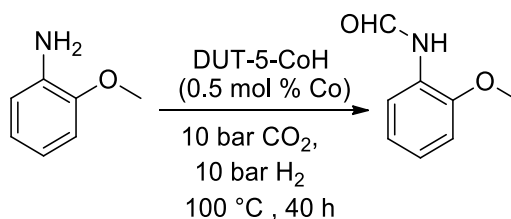

DUT-5-CoH (0.5 mol% of Co) in 3 ml of THF was transferred into a 50 mL glass liner in a glovebox. To the mixture, *o*-anisidine (42  $\mu$ L, 0.375 mmol) was added. Then, the liner was fitted in a Parr reactor and sealed. The sealed Parr reactor was taken out from the glovebox and purged it with CO<sub>2</sub> gas two times. The Parr reactor was pressurized to 10 bar CO<sub>2</sub> followed by 10 bar of H<sub>2</sub> and heated at 100 °C for 40 h. After the successful completion of the reaction, the reactor was cooled to room temperature, and the pressure was released. The solid MOF was removed from suspension inside the glove box, washed with THF multiple times, and reused. The combined organic extracts were concentrated in vacuo to yield *N*-(2-methoxyphenyl)formamide as the pure product. (0.045 g, 0.300 mmol, 80%).

**Table S2. Optimization reaction conditions for the *N*-formylation of *p*-toluidine.<sup>a</sup>**

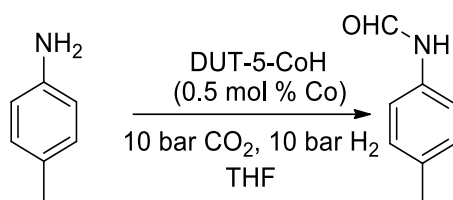

| Entry no. | Catalyst         | Reductant                     | Temperature (°C) | Time (h)    | Solvent    | GC-Yield (%) |
|-----------|------------------|-------------------------------|------------------|-------------|------------|--------------|
| 1         | DUT-5-CoH        | Phenylsilane (2.3 eq.)        | 100              | 40 h        | THF        | 4            |
| <b>2</b>  | <b>DUT-5-CoH</b> | <b>H<sub>2</sub> (10 bar)</b> | <b>100</b>       | <b>40 h</b> | <b>THF</b> | <b>80</b>    |
| 3         | DUT-5-CoH        | H <sub>2</sub> (10 bar)       | 25               | 40 h        | THF        | 2            |
| 4         | DUT-5-CoH        | H <sub>2</sub> (10 bar)       | 100              | 40 h        | Toluene    | 0            |

<sup>a</sup>Reaction conditions: DUT-5-CoH (0.5 mol% Co), 10 bar CO<sub>2</sub>, 3.0 mL solvent.

### 3.7. Investigation of the effect of varying substrate sizes on the rate of catalysis.

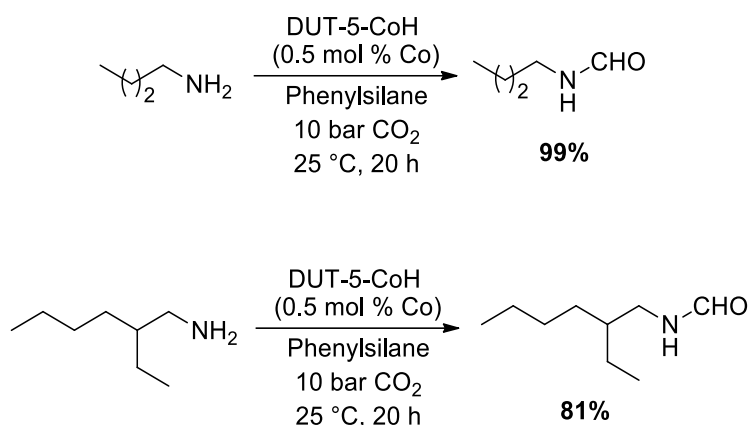

**Figure S3.** Comparative study of the effect of varying substrate sizes on the rate of *N*-formylation catalysed by DUT-5-CoH.

Inside the glovebox, butylamine (37  $\mu$ L, 0.375 mmol), and 2-ethyl hexylamine (60  $\mu$ L, 0.375 mmol), were added separately into two 50 mL glass liners. Then, DUT-5-CoH (0.5 mol% of Co) as a slurry in 3 mL THF and 106  $\mu$ l phenylsilane were added to each of the liners, and were fitted in two separate Parr reactors. The reactors were sealed, then taken out from the glove box, purged two times with CO<sub>2</sub>, and then pressurized each of them to 10 bar CO<sub>2</sub>. Reactors were then stirred at 25 °C for 20 h. After the successful completion of the reaction, the pressure of the reactors was released. The solid MOF was removed from suspension inside the glove box, washed with THF multiple times, and reused. The combined organic extract of both the reactions was concentrated and analyzed using GC-MS. The *N*-butylformamide from butylamine and *N*-(2-ethylhexyl)formamide from 2-ethyl hexylamine were produced in 99% and 81% GC-yields, respectively. This experiment demonstrates that the rate of *N*-formylation with larger substrates is slower, presumably due to the slower diffusion of the larger branched substrates and the corresponding products through the MOF's channels.

### 3.8. Test for “heterogeneity” of DUT-5-Co in *N*-formylation of amines.

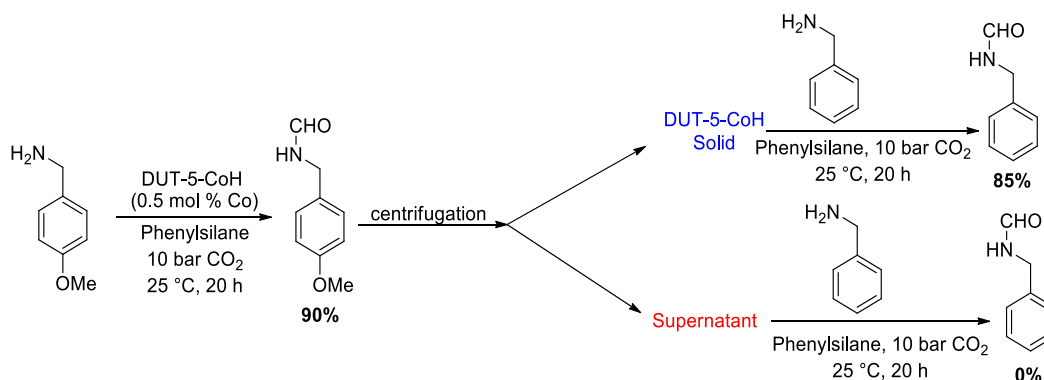

**Figure S4.** Heterogeneity test of DUT-5-CoH for the *N*-formylation of amines.

DUT-5-CoH (0.5 mol% of Co) in 3 ml of THF was transferred into a 50 mL glass liner in a glovebox. To the mixture, *p*-methoxy benzylamine (49  $\mu$ l, 0.375 mmol) and 106  $\mu$ l Phenyl silane were added. Then, the liner was fitted in a Parr reactor and sealed. The sealed Parr reactor was taken out from the glovebox and purged it with CO<sub>2</sub> gas two times. The Parr reactor was pressurized to 10 bar CO<sub>2</sub> and stirred at 25°C for 20 h. After the completion of the reaction, the pressure of the reactor was released. The solid MOF was removed from suspension to separate the solid and the supernatant, inside the glove box and washed with THF multiple times. The conversion analysed by taking aliquots from the organic extract gave 90% *N*-(4-methoxybenzyl)formamide.

Two reactions were set up separately in two different Parr reactors, one with the solid and the other one with the supernatant recovered from the previous reaction. The extracted solid and supernatant were added into two separate liners, and benzylamine (41  $\mu$ l, 0.375 mmol), 106  $\mu$ l phenylsilane, and 3 mL of THF were added to each liner. Then both the liners were fitted into two separate Parr reactors and sealed. The sealed Parr reactor was taken out from the glovebox and purged it with CO<sub>2</sub> gas two times. The Parr reactor was pressurized to 10 bar CO<sub>2</sub> and stirred at 25°C for 20 h. After the completion of the reaction, the pressure of the reactors was released. The reactions were analysed with the GC-MS, which showed that the reaction with the solid MOF gave 100% conversion with 85% yield, while the reaction with supernatant gave 0% conversion. This experiment excludes the potential of any leached Co-species responsible for catalysis and confirms that solid DUT-5-CoH was the actual catalyst for the *N*-formylation of amines.

**3.9. Hg test.** A catalytic *N*-formylation of amine was carried out in the presence of a drop of Hg to investigate the role of any leached Co-nanoparticles in the solution responsible for catalysis. Hg is known to form an amalgam with metallic cobalt, thus removing any in-situ-borne metallic cobalt during catalysis. The details of the experiments are as follows:



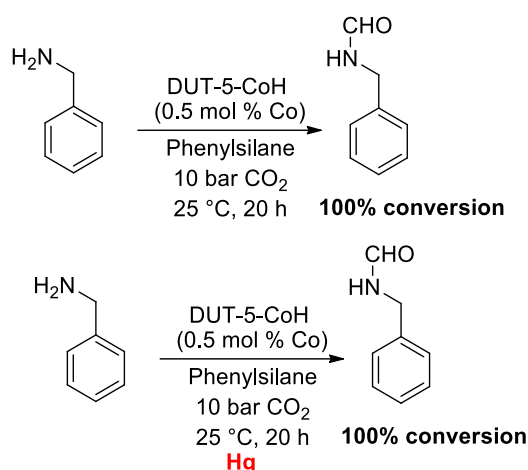

**Figure S5.** Hg test in the *N*-formylation of benzylamine with DUT-5-CoH.

DUT-5-CoH (0.5 mol % of Co) was charged into two separate 3 mL vials and washed with THF multiple times inside the glovebox. The MOF as a slurry in 3 mL THF was transferred to the two separate 50 mL glass liners. Benzylamine (41  $\mu\text{l}$ , 0.375 mmol), 106  $\mu\text{l}$  phenylsilane and 3 mL of THF was added to both the liners. In one of the reaction mixtures, a drop of mercury was added. Then, the liners were fitted in a Parr reactor and sealed. The sealed Parr reactors were taken out from the glovebox and purged it with  $\text{CO}_2$  gas two times, then pressurized with 10 bar  $\text{CO}_2$ . The reactors were then stirred at 25  $^\circ\text{C}$  for 20 h. After the completion of the reaction, the pressure of the reactor was released. The solid MOF was removed from the suspension inside the glove box and washed with THF multiple times. The catalytical conversion was 100% for both the reactions analysed by GC-MS. We thus conclude that any leached Co-particles were not responsible for the catalytical activity, and DUT-5-CoH was the actual catalyst.

### 3.10. Recycling of DUT-5-CoH for the *N*-formylation of amines.

In order to monitor the intrinsic initial activity of each run and also to check the stability of the MOF-catalyst, the recycle and reuse experiment using DUT-5-CoH was conducted at incomplete conversion (~50-60%) for same reaction time (4 h). The catalytic activity of DUT-5-Co remained the same till run 16, and the leaching of Co and Al was very low (Table S3). The detailed procedure of the recycling experiments is given below.

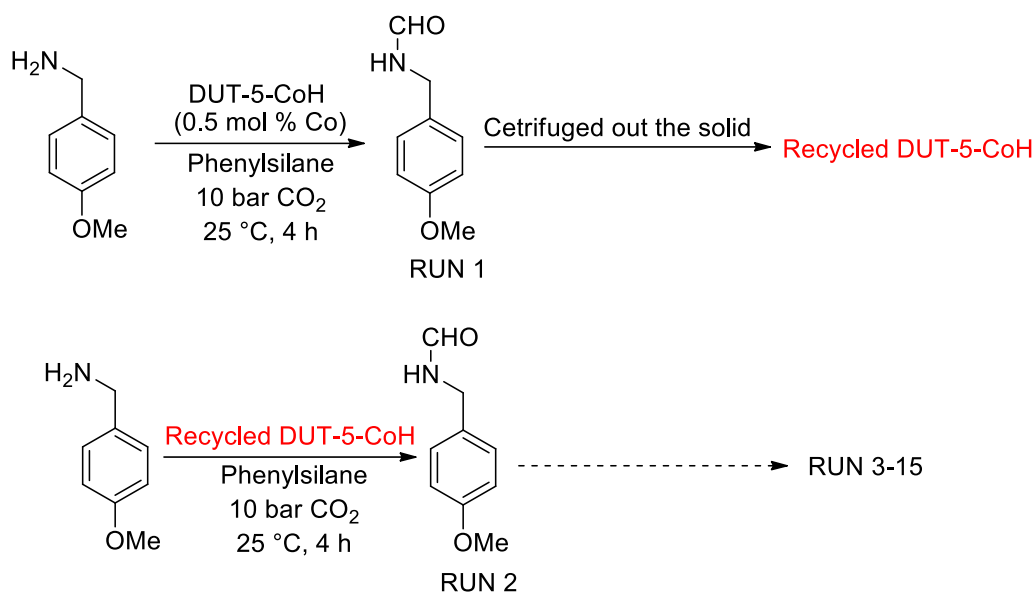

**Figure S6.** Recycle and reuse of DUT-5-CoH in *N*-formylation of *p*-methoxy benzylamine.

DUT-5-CoH (0.5 mol% of Co) in 3 ml of THF was transferred into a 50 mL glass liner in a glovebox. To the mixture, *p*-methoxy benzylamine (49  $\mu$ l, 0.375 mmol and 106  $\mu$ l Phenylsilane) were added. Then, the liner was fitted in a Parr reactor and sealed. The sealed Parr reactor was taken out from the glovebox and purged it with CO<sub>2</sub> gas two times. The Parr reactor was pressurized to 10 bar CO<sub>2</sub> and stirred at 25  $^\circ$ C for 4 h. After certain time intervals, the reaction was depressurized and a small aliquot from the reaction mixture was taken out and analysed by GC-MS. The solid was centrifuged out of the suspension, washed with THF multiple times, and recycled.

The recovered MOF-catalyst was again added to the liner. Then, 3 mL of THF, 106  $\mu$ l phenylsilane and *p*-methoxy benzylamine (49  $\mu$ l, 0.375 mmol) were added to it and fitted in a Parr reactor. The reactor was sealed, taken out from the glovebox, and purged it with CO<sub>2</sub> gas two times. The Parr reactor was pressurized to 10 bar CO<sub>2</sub> and stirred at 25  $^\circ$ C for 4 h. After the reaction, the solution was analysed in the same way as mentioned previously in run 1. The recycling and reuse experiments were performed 15 times in total.

**Table S3. % GC-Yield of *N*-(4-methoxybenzyl)formamide, the leaching of Co at various runs of the recycling of DUT-5-CoH in the *N*-formylation of *p*-methoxy benzylamine.**

| No. of Run | Time | %GC-Yield | %Leaching (Co, Al) |
|------------|------|-----------|--------------------|
| Run-1      | 4 h  | 55        | 0.02, 0.9          |
| Run-2      | 4 h  | 59        |                    |
| Run-3      | 4 h  | 52        |                    |
| Run-4      | 4 h  | 53        |                    |
| Run-5      | 4 h  | 58        |                    |
| Run-6      | 4 h  | 57        |                    |
| Run-7      | 4 h  | 56        | 0.04, 1.02         |
| Run-8      | 4 h  | 58        |                    |
| Run-9      | 4 h  | 55        |                    |
| Run-10     | 4 h  | 53        | 0.05, 1.67         |
| Run-11     | 4 h  | 57        |                    |
| Run-12     | 4 h  | 54        |                    |
| Run-13     | 4 h  | 56        |                    |
| Run-14     | 4 h  | 58        | 0.08, 2.01         |
| Run-15     | 4 h  | 55        |                    |
| Run-16     | 4 h  | 54        |                    |

**3.9 Investigation of the effect of pore sizes on the rate of catalysis.** The effect of pore sizes on the rate of catalytic reaction was investigated by comparing the rate of *N*-formylation reactions of amines catalyzed by DUT-5-CoH with that of MIL-53(Al)-CoH under identical reaction conditions. MIL-53(Al)-CoH has the same topology but smaller pore sizes compared to DUT-5-CoH.

**3.9.3. Synthesis and characterizations of MIL-53(Al)-CoH.** MIL-53(Al) was synthesized according to the reported procedure.<sup>1</sup> MIL-53(Al) was then treated with *n*-BuLi in THF, to which a solution of CoCl<sub>2</sub> (0.018 g, 0.144 mmol) in THF was added to give a blue-coloured MOF of MIL-53(Al)-CoCl. It was then treated with NaEt<sub>3</sub>BH to finally produce MIL-53(Al)-CoH MOF.

**3.9.4. Comparison of the catalytic activities of DUT-5-CoH and MIL-53(Al)-CoH in the *N*-formylation of amines under identical conditions.**

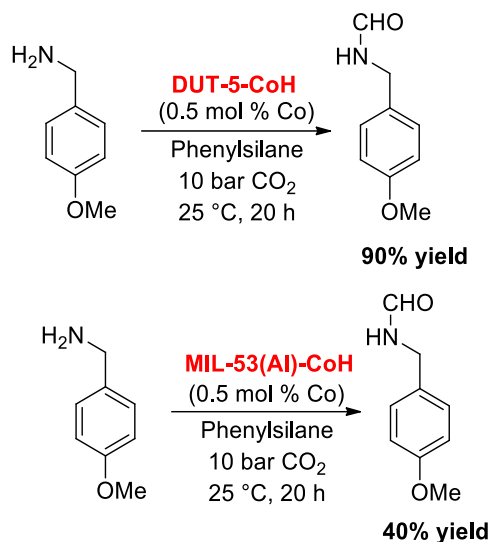

**Figure S7.** The *N*-formylation of 4-methoxybenzylamine catalyzed by DUT-5-CoH and MIL-53(Al)-CoH under identical reaction conditions.

Two separate 5 ml vials were charged with pre-activated DUT-5-CoH (0.5 mol% of Co) and MIL-53(Al)-CoH (0.5 mol% of Co) each and washed with THF multiple times. Each MOF slurry in 3 ml THF were transferred to two different 50 ml glass liners containing 4-methoxybenzylamine (49  $\mu$ l, 0.375 mmol) and Phenylsilane (106  $\mu$ L, 0.865 mmol). The liners were fitted into the Parr reactors and sealed properly. The sealed Parr reactors were taken out from the glove box. The reactors were purged twice with the CO<sub>2</sub>, then charged with 10 bar CO<sub>2</sub> each and stirred at 25 °C for 20 h. After the completion of the reaction, the pressure from the reactors was released. The solid MOF was then removed from suspension inside the glove box and the combined organic extracts were evaporated and analysed by GC-MS. The catalytical conversions for both the reactions were 100%, while the selectivity to get *N*-(4-methoxyphenyl)formamide were 90% and 40% with DUT-5-CoH and MIL53(Al)-CoH, respectively. This experiment indicates that the larger pore size MOF (DUT-5-CoH) has comparatively higher efficiency than the smaller pore size MIL-53(Al)-CoH MOF due to the facile diffusion of substrates into the larger pores of DUT-5-CoH.

### 3.10. Comparison of the catalytic activities of DUT-5-CoH and Co-nanoparticles in the *N*-formylation of amines under identical reaction conditions.

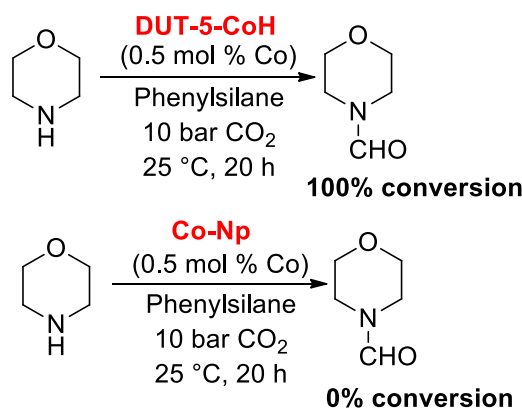

**Figure S8.** The *N*-formylation of morpholine catalyzed by DUT-5-CoH and Co-nanoparticles under identical conditions.

A 5 ml vial was charged with pre-activated DUT-CoH (0.5 mol% of Co) and washed with THF multiple times. The MOF slurry in 3 ml THF was transferred to a 50 ml glass liners containing morpholine (32  $\mu$ l, 0.375 mmol) and Phenylsilane (106  $\mu$ L). Another 5 ml vial was charged with CoCl<sub>2</sub> (0.5 mol% of Co) in 3 ml THF to which NaBEt<sub>3</sub>H (10  $\mu$ L, 1 M in toluene) was added and stirred gently for 1 h. The solution was then transferred to another 50 ml liner containing morpholine (32  $\mu$ l, 0.375 mmol) and Phenylsilane (106  $\mu$ L). Both the liners were fitted into Parr reactors and sealed properly. The sealed Parr reactors were taken out from the glove box. The reactors were purged two times with the CO<sub>2</sub> and then charged with 10 bar CO<sub>2</sub> each and stirred at 25 °C for 20 h. After the completion of the reaction, the pressure from the reactors was released. The solid MOF was then removed from suspension inside the glove box and washed with THF multiple times. The catalytical conversions were 100% and 0% with DUT-5-CoH and Co-Np, respectively, as analyzed by GC-MS suggesting the inactivity of Cobalt-nanoparticle in *N*-formylation reaction.

#### 4. Determination of the rate law for DUT-5-CoH catalysed *N*-formylation of benzylamine.

The rate law for *N*-formylation of benzylamine was determined by the method of initial rates (up to 10% conversion).<sup>2</sup> The reactions were conducted in THF (total volume of solution was 3.0 mL) in a Parr reactor at 100 °C. For each kinetic experiment, a glass liner was charged with MOF-catalyst, benzylamine, phenylsilane and THF under N<sub>2</sub>. The liner was fitted in a Parr reactor and sealed properly, pressurized with CO<sub>2</sub> and heated at 100 °C for 30 min. The concentration of the product was analysed by GC-FID using mesitylene as an internal standard. The initial rates for the *N*-formylation of benzylamine were measured for several substrate

concentrations at constant catalyst concentration. Linear regression fits for [benzylamine] versus time for the first 30 min of the reaction provided the initial rate ( $d[\text{benzylamine}]/dt$ ) for a particular initial substrate concentration. To determine the rate dependence on one reagent, the concentration of that reagent was varied, while the concentration of other reagents, pressure, and the total volume of solution (3.0 mL) were kept constant. The rate dependence on  $\text{CO}_2$  pressure was measured, while keeping all the reagents constant and varying  $\text{CO}_2$  pressure. The rates refer to the rates of consumption of benzylamine in units of  $\text{M}\cdot\text{min}^{-1}$ . To determine the rate dependence on the catalyst, the concentration of Co was varied between  $6.33\times 10^{-3}$ – $2.5\times 10^{-2}$  mM, while the initial concentrations of benzylamine were  $1.83\times 10^{-1}$  mM, concentration of phenylsilane was  $4.21\times 10^{-1}$  mM and  $\text{CO}_2$  pressure was 10 bar. To determine the rate dependence on benzylamine, initial concentration of phenylsilane was  $4.21\times 10^{-1}$  mM and  $\text{CO}_2$  pressure was 10 bar, while the concentration of benzylamine was varied between  $9.1\times 10^{-2}$  to  $3.6\times 10^{-1}$  mM, while the concentration of Co was  $6.33\times 10^{-3}$  mM. To determine the rate dependence on pressure of  $\text{CO}_2$ , the concentrations of benzylamine were  $1.83\times 10^{-1}$  mM, concentration of phenylsilane was  $4.21\times 10^{-1}$  mM, and  $\text{CO}_2$  pressure was varied from 10-40 bar, while the concentration of Co was  $6.33\times 10^{-3}$  mM. To determine the rate dependence on phenylsilane, the concentration of phenylsilane was varied between  $2.67\times 10^{-1}$ – $5.1\times 10^{-1}$  mM, while the initial concentrations of benzylamine were  $1.83\times 10^{-1}$  mM, concentration of Co was  $6.33\times 10^{-3}$  mM and  $\text{CO}_2$  pressure was 10 bar.

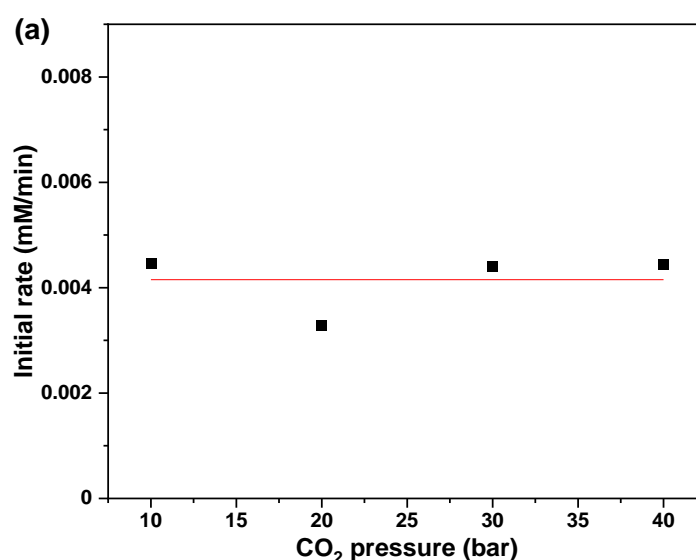

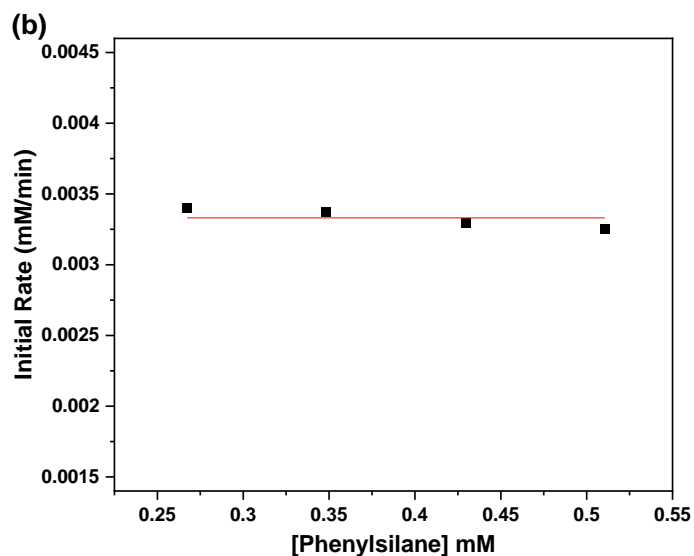

**Figure S9.** (a) Plot of initial rate  $-(d[\text{benzylamine}]/dt)$  versus initial pressure of  $\text{CO}_2$  (bar) for the first 30 min (<10% conversion) in THF showing the independence of initial rates on  $\text{CO}_2$  pressure. (b) Plot of initial rate  $-(d[\text{benzylamine}]/dt)$  versus initial concentration of phenylsilane (mM) for the first 30 min (<10% conversion) in THF showing the independence of initial rates on phenylsilane concentration.

**5. Analysis of products by GC-MS.** The conversions and yields of the reactions were determined by Agilent 7890B gas chromatograph equipped with a mass detector (Agilent 5977B GC/MSD) and HP-5MS Ultra Inert 30 m-250  $\mu\text{m}$ -0.25  $\mu\text{m}$  column for GC-MS. GC-MS conditions: Inj: 220  $^\circ\text{C}$ ; Det: 250  $^\circ\text{C}$ ; Column temp: 80  $^\circ\text{C}$  followed by a ramp of 5  $^\circ\text{C}/\text{min}$  to 220  $^\circ\text{C}$ ; Column flow: 1.0 mL/min.

**Table S4.** The GC-MS retention times of the arene substrates and the products.

| Entry | Substrate | Product | Retention time |
|-------|-----------|---------|----------------|
| 1     |           |         | 20.02          |
| 2     |           |         | 14.17          |

|    |                                                                                     |                                                                                      |       |
|----|-------------------------------------------------------------------------------------|--------------------------------------------------------------------------------------|-------|
| 3  | 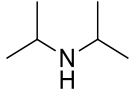   |    | 6.07  |
| 4  |    |    | 13.23 |
| 5  |    |    | 7.90  |
| 6  |    |    | 16.52 |
| 7  |    |    | 16.62 |
| 8  |    |   | 9.86  |
| 9  |  |  | 5.70  |
| 10 |  |  | 13.05 |
| 11 |  |  | 18.99 |
| 12 |  |  | 14.34 |
| 13 |  |  | 16.07 |
| 14 |  |  | 26.92 |



|    |                                                                                     |                                                                                      |                  |
|----|-------------------------------------------------------------------------------------|--------------------------------------------------------------------------------------|------------------|
| 15 | 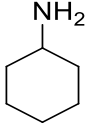   |    | 10.62            |
| 16 |    |    | 7.51             |
| 17 |    |    | 6.73             |
| 18 |    |    | 16.83            |
| 19 |    |    | 9.42             |
| 20 |    |    | 6.2 <sup>a</sup> |
| 21 |  |  | 4.8 <sup>a</sup> |
| 22 |  |  | 9.18             |
| 23 |  |  | 16.03            |
| 24 |  |  | 15.96            |
| 25 |  |  | 14.88            |

<sup>a</sup>MS conditions: Inj: 220 °C; Det: 250 °C; Column temp: 40 °C followed by a ramp of 5 °C/min to 220 °C; Column flow: 1.0 mL/min.

**6. Table S5. Comparison of catalytic activity of DUT-5-CoH with that of other reported heterogeneous catalysts in N-formylation of amines with CO<sub>2</sub>.**

| Sl no. | Reference                                          | Catalyst                                                       | Conditions                                                                                                                     | Productivity | %Yield of N-Formaldehyde |
|--------|----------------------------------------------------|----------------------------------------------------------------|--------------------------------------------------------------------------------------------------------------------------------|--------------|--------------------------|
| 1      | New J. Chem., 2021,45, 9501-9505                   | Zn(OAc) <sub>2</sub> on mesoporous organosilica                | 1 mmol amine, CO <sub>2</sub> (5 bar), PhSiH <sub>3</sub> (1 mmol), 1 mol% Catalyst, 60° C, 17 h, CH <sub>3</sub> CN           |              | 33-86%                   |
| 2      | ACS Sustainable Chem. Eng., 2020, 8, 14, 5576–5583 | Ru-PPh <sub>3</sub> -SO <sub>3</sub> Na@POPs                   | 1 mmol amine, CO <sub>2</sub> (30 bar), H <sub>2</sub> (30 bar), 0.4 mol% Catalyst, 100° C, 48 h, DMI                          | TON 250      | 30-80%                   |
| 3      | Chem. Cat. Chem., 2018, 10, 22, 5124-5127          | Mg-Al layered double hydroxide supported Pd catalyst           | 1 mmol amine, CO <sub>2</sub> (30 bar), H <sub>2</sub> (30 bar), 1 mol% Catalyst, 140° C, 16 h, CH <sub>3</sub> OH             |              | 88-97%                   |
| 4      | Sci. China Chem., 2018, 61, 725–731                | Pd/N-doped carbon nanocatalysts                                | 1 mmol amine, CO <sub>2</sub> (30 bar), H <sub>2</sub> (40 bar), 20 mg (2 mol%) Catalyst, 130° C, 24 h, ethanol                | TON 247      | 11-99%                   |
| 5      | Chem. Asian J., 2018, 13, 20, 3018-3021            | NHC-Ir coordination assembly                                   | 10 mmol amine, CO <sub>2</sub> (30 bar), H <sub>2</sub> (30 bar), 0.1 mol% Catalyst, 100° C, 20 h, CH <sub>3</sub> OH          | TON 990      | 53-97%                   |
| 6      | Inorganica Chim. Acta., 2020, 501, 119274          | UiO-66 MOF                                                     | 5 mmol amine, CO <sub>2</sub> (10 bar), DMAB (1.5 eq.), 10 mg (0.3 mol%) Catalyst, 60° C, 12 h, DMF                            |              | 30-94%                   |
| 7      | New J. Chem., 2017, 41, 2869-2872                  | CarPy-CMP@Ru (Pyridine-functionalized organic porous polymers) | 1 mmol amine, CO <sub>2</sub> (40 bar), H <sub>2</sub> (40 bar), 0.5 mol% Catalyst, 130° C, 24 h, CH <sub>3</sub> OH           | TON 188      | 89-91%                   |
| 8      | Chem. Cat. Chem., 2017, 9, 11, 1939-1946           | Pd NPs@Hyperscrosslinked Microporous Polymer                   | 1 mmol amine, CO <sub>2</sub> (10 bar), Diphenylmethylsilane (2.5 mmol), 50 mg (0.5 mol%) Catalyst, 60° C, 20 h, dioxane+water |              | 79-97%                   |

|    |                                                       |                                                                                                         |                                                                                                                                              |                 |                |
|----|-------------------------------------------------------|---------------------------------------------------------------------------------------------------------|----------------------------------------------------------------------------------------------------------------------------------------------|-----------------|----------------|
| 9  | Catal. Lett., 2018, 148, 2487–2500                    | FeNi <sub>3</sub> /KCC1/APTPOSS/TCT/PVA/Cu(II) MNPs (Copper(II) Complex-Based FeNi <sub>3</sub> /KCC-1) | 10 mmol amine, CO <sub>2</sub> (15 bar), H <sub>2</sub> (20 bar), 18 mg Catalyst, 90° C, 1.5 h, dioxane                                      |                 | 58-96%         |
| 10 | ACS Sustainable Chem., Eng. 2017, 5, 3, 2516–2528     | Pd–Au@Polyaniline-Functionalized CNs                                                                    | 1 mmol amine, CO <sub>2</sub> (35 bar), H <sub>2</sub> (35 bar), 50 mg (Pd 1.6 wt %, Au 3.0 wt %) Catalyst, 125° C, 48 h, dioxane            |                 | 0.1-95%        |
| 11 | Chem. Cat. Chem., 2017, 9, 19, 3632-3636              | Au NPs@TiO <sub>2</sub>                                                                                 | 0.5 mmol amine, CO <sub>2</sub> (20 bar), H <sub>2</sub> (30 bar), 4.5 mol% Catalyst, 100-140° C, 5-20 h, DMA                                |                 | 91-99%         |
| 12 | Chin. J. Catal., 2019, 40, 8, 1141-1146               | Pd/PAL catalyst (PAL-Palygorskite)                                                                      | 1 mmol amine, CO <sub>2</sub> (10 bar), H <sub>2</sub> (30 bar), 0.35 mol% Catalyst, 96° C, CH <sub>3</sub> OH                               | TON 283         | 76-99%         |
| 13 | ACS Sustainable Chem., Eng., 2021, 9, 48, 16153-16162 | Pd <sub>0.25</sub> Cu <sub>0.75</sub> /Al <sub>2</sub> O <sub>3-0.1</sub>                               | 1 mmol amine, CO <sub>2</sub> (20 bar), H <sub>2</sub> (40 bar), 60 mg Catalyst, 150° C, 3 h, THF                                            | TON 527         | 8-99%          |
| 14 | Appl. Catal. B., 2021, 294, 5, 120238                 | Zn-TpPa (Zn single atom catalyst@COF)                                                                   | CO <sub>2</sub> (10 bar), phenylsilane(2 eq.), 30° C, 18 h, DMF                                                                              | TON 51467       | 79-99%         |
| 15 | <b>This work</b>                                      | DUT-5-CoH MOF                                                                                           | <b>0.375 mmol amine, CO<sub>2</sub> (10 bar), H<sub>2</sub> (10 bar), Phenylsilane (0.862 mmol), 0.5 mol% Catalyst, 25-100° C, 20 h, THF</b> | <b>TON 4738</b> | <b>35-100%</b> |

## 7. Characterization of the products.

### *N*-(4-methoxybenzyl)formamide<sup>3</sup>

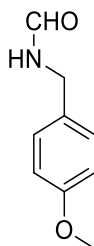

*N*-(4-methoxybenzyl)formamide was synthesized in 100% yield with 90% selectivity according to the general procedure for the *N*-formylation of amines using DUT-5-CoH (0.5 mol% of Co), *p*-methoxy benzylamine (49  $\mu$ L, 0.375 mmol), 106  $\mu$ L Phenyl silane and 10 bar CO<sub>2</sub> at 25 °C for 20 h. <sup>1</sup>H NMR (400 MHz, CDCl<sub>3</sub>),  $\delta$  (ppm): 8.21 (s, 1 H), 7.16–7.28 (m, 2 H), 6.85–6.91 (m, 2 H), 6.05 (br, 1 H), 4.40 (d, <sup>3</sup>*J*<sub>H-H</sub> = 5.61 Hz, 2 H), 3.80 (s, 3 H).

### *N*-benzylformamide<sup>4</sup>

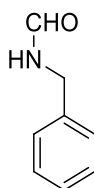

*N*-benzylformamide was synthesized in 100% yield with 85% selectivity according to the general procedure for the *N*-formylation of amines using DUT-5-CoH (0.5 mol% of Co), benzylamine (41  $\mu$ L, 0.375 mmol), 106  $\mu$ L Phenyl silane and 10 bar CO<sub>2</sub> at 25 °C for 20 h. <sup>1</sup>H NMR (500 MHz, CDCl<sub>3</sub>)  $\delta$  (ppm): 8.19 (s, 1 H), 7.29-7.19 (m, 5 H), 5.85 (br, 1 H), 4.42 (d, <sup>3</sup>*J*<sub>H-H</sub> = 6.0 Hz, 2 H).

### *N,N*-diisopropylformamide<sup>5</sup>

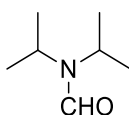

*N,N*-diisopropylformamide was synthesized in 100% yield with 99% selectivity according to the general procedure for the *N*-formylation of amines using DUT-5-CoH (0.5 mol% of Co), diisopropylamine (53  $\mu$ L, 0.375 mmol), 106  $\mu$ L Phenyl silane and 10 bar CO<sub>2</sub> at 25 °C for 20 h.

$^1\text{H}$  NMR (400 MHz,  $\text{CDCl}_3$ )  $\delta$  (ppm) 8.59 (s, 1 H), 3.33-3.27 (m, 2 H), 1.33 (d,  $^3J_{\text{H-H}} = 8.0$  Hz, 12 H).  $^{13}\text{C}$  NMR (100 MHz,  $\text{CDCl}_3$ )  $\delta$  167.7, 46.1, 18.7.

#### Piperidine-1-carbaldehyde<sup>4</sup>

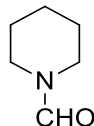

piperidine-1-carbaldehyde was synthesized in 100% yield with 81% selectivity according to the general procedure for the *N*-formylation of amines using DUT-5-CoH (0.5 mol% of Co), piperidine (37  $\mu\text{L}$ , 0.375 mmol), 106  $\mu\text{L}$  Phenyl silane and 10 bar  $\text{CO}_2$  at 25  $^\circ\text{C}$  for 20 h.  $^1\text{H}$  NMR (400 MHz,  $\text{CDCl}_3$ ),  $\delta$  (ppm): 7.87 (s, 1 H), 3.35 (t,  $^3J_{\text{H-H}} = 5.0$  Hz, 2 H), 3.19 (t,  $^3J_{\text{H-H}} = 5.0$  Hz, 2 H), 1.59-1.54 (m, 2 H), 1.48-1.39 (m, 4 H).

#### *N*-(3-methylbenzyl)formamide<sup>6</sup>

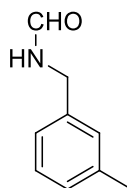

*N*-(3-methylbenzyl)formamide was synthesized in 100% yield with 80% selectivity according to the general procedure for the *N*-formylation of amines using DUT-5-CoH (0.5 mol% of Co), 3-methyl benzylamine (46  $\mu\text{L}$ , 0.375 mmol), 106  $\mu\text{L}$  Phenyl silane and 10 bar  $\text{CO}_2$  at 25  $^\circ\text{C}$  for 20 h.  $^1\text{H}$  NMR (400 MHz,  $\text{CDCl}_3$ ),  $\delta$  (ppm): 8.20 (d,  $^3J_{\text{H-H}} = 11.9$  Hz, 1 H), 7.07-7.32 (m, 4 H), 5.98 (br, 1 H), 4.48 (d,  $^3J_{\text{H-H}} = 6.0$  Hz, 2 H), 2.38 (s, 3 H).

#### *N*-(4-methylbenzyl)formamide<sup>6</sup>

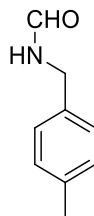

*N*-(4-methylbenzyl)formamide was synthesized in 100% yield with 99% selectivity according to the general procedure for the *N*-formylation of amines using DUT-5-CoH (0.5 mol% of Co), 4-methyl benzylamine (46  $\mu\text{L}$ , 0.375 mmol), 106  $\mu\text{L}$  Phenyl silane and 10 bar  $\text{CO}_2$  at 25  $^\circ\text{C}$  for 20 h.  $^1\text{H}$  NMR (400 MHz,  $\text{CDCl}_3$ ),  $\delta$  (ppm): 8.13 (d,  $^3J_{\text{H-H}} = 12$  Hz, 1 H), 7.12-7.18 (m, 4 H), 6.10 (br, 1 H), 4.41 (d,  $^3J_{\text{H-H}} = 6.2$  Hz, 2 H), 2.34 (s, 3 H).

### ***N*-hexylformamide<sup>4</sup>**

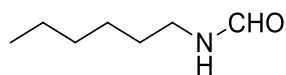

*N*-hexylformamide was synthesized in 100% yield with 99% selectivity according to the general procedure for the *N*-formylation of amines using DUT-5-CoH (0.5 mol% of Co), hexylamine (49  $\mu$ L, 0.375 mmol), 106  $\mu$ L Phenyl silane and 10 bar CO<sub>2</sub> at 25 °C for 20 h in 3 ml THF. <sup>1</sup>H NMR (400 MHz, CDCl<sub>3</sub>),  $\delta$  (ppm): 8.14 (d, <sup>3</sup>*J*<sub>H-H</sub> = 12.0 Hz, 1 H), 5.79 (s, 1 H), 3.29-3.24 (m, 2 H), 1.52-1.49 (m, 2 H), 1.32-1.28 (m, 6 H), 0.88-0.85 (m, 3 H).

### ***N*-butylformamide<sup>7</sup>**

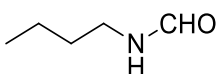

*N*-butylformamide was synthesized in 100% yield with 99% selectivity according to the general procedure for the *N*-formylation of amines using DUT-5-CoH (0.5 mol% of Co), butylamine (37  $\mu$ L, 0.375 mmol), 106  $\mu$ L Phenyl silane and 10 bar CO<sub>2</sub> at 25 °C for 20 h in 3 ml THF. <sup>1</sup>H NMR (400 MHz, CDCl<sub>3</sub>),  $\delta$  (ppm): 8.05 (d, 1 H), 6.74 (s, 1 H), 3.15 (m, 2 H), 1.41 (q, 2 H), 1.26 (h, 2 H), 0.83 (t, 3 H).

### ***N*-octylformamide<sup>7</sup>**

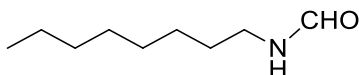

*N*-octylformamide was synthesized in 100% yield with 99% selectivity according to the general procedure for the *N*-formylation of amines using DUT-5-CoH (0.5 mol% of Co), octylamine (62  $\mu$ L, 0.375 mmol), 106  $\mu$ L Phenyl silane and 10 bar CO<sub>2</sub> at 25 °C for 20 h. <sup>1</sup>H NMR (400 MHz, CDCl<sub>3</sub>),  $\delta$  (ppm):  $\delta$  8.24–7.94 (m, 1 H), 5.79 (d, 1 H), 3.23 (dd, 2 H), 1.27 (d, 10 H), 0.94–0.76 (m, 3 H).

### ***N*-(3-chlorobenzyl)formamide<sup>6</sup>**

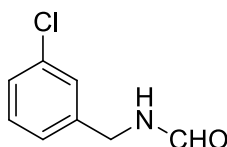

*N*-(3-chlorobenzyl)formamide was synthesized in 85% yield with 76% selectivity according to the general procedure for the *N*-formylation of amines using DUT-5-CoH (0.5 mol% of Co), *m*-chloro benzylamine (46  $\mu$ L, 0.375 mmol), 106  $\mu$ L Phenyl silane and 10 bar CO<sub>2</sub> at 100 °C for 20

h.  $^1\text{H}$  NMR (400 MHz,  $\text{CDCl}_3$ ),  $\delta$  (ppm): 8.10 (d,  $^3J_{\text{H-H}} = 11.8$  Hz, 1 H), 7.09-7.20 (m, 4 H), 5.97 (br, 1 H), 4.39 (d,  $^3J_{\text{H-H}} = 6.2$  Hz, 2 H).

### ***N*-(4-fluorobenzyl)formamide<sup>3</sup>**

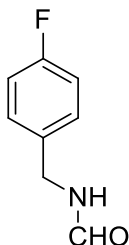

*N*-(4-fluorobenzyl)formamide was synthesized in 60% yield with 42% selectivity according to the general procedure for the *N*-formylation of amines using DUT-5-CoH (0.5 mol% of Co), *p*-fluoro benzylamine (43  $\mu\text{L}$ , 0.375 mmol), 106  $\mu\text{L}$  Phenyl silane and 10 bar  $\text{CO}_2$  at 100  $^\circ\text{C}$  for 20 h.  $^1\text{H}$  NMR (400 MHz,  $\text{CDCl}_3$ ),  $\delta$  (ppm): 8.10 (s, 1 H), 7.09–7.14 (m, 2 H), 6.85–6.94 (m, 2 H), 05.98 (br, 1 H), 4.30 (d,  $^3J_{\text{H-H}} = 6.0$  Hz, 2 H).

### ***N*-phenethylformamide<sup>8</sup>**

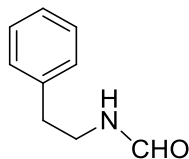

*N*-phenethylformamide was synthesized in 100% yield with 75% selectivity according to the general procedure for the *N*-formylation of amines using DUT-5-CoH (0.5 mol% of Co), phenethylamine (47  $\mu\text{L}$ , 0.375 mmol), 106  $\mu\text{L}$  Phenyl silane and 10 bar  $\text{CO}_2$  at 25  $^\circ\text{C}$  for 20 h.  $^1\text{H}$  NMR (400 MHz,  $\text{CDCl}_3$ ),  $\delta$ (ppm): 8.09 (d,  $^3J_{\text{H-H}} = 1.7$  Hz, 1 H), 7.33-7.27 (m, 2 H), 7.27-7.16 (m, 3 H), 5.87 (br, 1 H), 3.58-3.53 (m, 2 H), 2.88-2.79 (m, 2 H).  $^{13}\text{C}$  NMR ( $\text{CDCl}_3$ , 100 MHz),  $\delta$ (ppm): 161.2, 138.4, 128.7, 128.6, 126.6, 39.1, 35.4.

### ***N,N*-dibenzylformamide<sup>8</sup>**

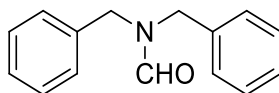

*N,N*-dibenzylformamide was synthesized in 100% yield with 75% selectivity according to the general procedure for the *N*-formylation of amines using DUT-5-CoH (0.5 mol% of Co), dibenzylamine (41  $\mu\text{L}$ , 0.375 mmol), 106  $\mu\text{L}$  Phenyl silane and 10 bar  $\text{CO}_2$  at 25  $^\circ\text{C}$  for 27 h.  $^1\text{H}$  NMR (400 MHz,  $\text{CDCl}_3$ ),  $\delta$ (ppm): 8.42 (s, 1 H), 7.40-7.29 (m, 6 H), 7.21-7.16 (m, 4 H), 4.42 (s,

2 H), 4.26 (s, 2 H).  $^{13}\text{C}$  NMR ( $\text{CDCl}_3$ , 100 MHz),  $\delta(\text{ppm})$ : 162.8, 135.9, 135.5, 128.8, 128.6, 128.4, 128.1, 127.6, 127.6, 50.2, 44.6.

#### ***N*-cyclohexylformamide<sup>7</sup>**

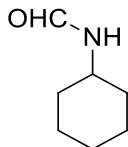

*N*-cyclohexylformamide was synthesized in 100% yield with 81% selectivity according to the general procedure for the *N*-formylation of amines using DUT-5-CoH (0.5 mol% of Co), cyclohexylamine (43  $\mu\text{L}$ , 0.375 mmol), 106  $\mu\text{L}$  Phenyl silane and 10 bar  $\text{CO}_2$  at 25  $^\circ\text{C}$  for 20 h.  $^1\text{H}$  NMR ( $\text{CDCl}_3$ ),  $\delta(\text{ppm})$ : 8.05 (d, 1 H), 6.17 (d, 1 H), 3.99–3.01 (m, 1 H), 1.99–1.44 (m, 5 H), 1.44–1.03 (m, 5 H).

#### **Morpholine-4-carbaldehyde<sup>4</sup>**

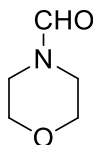

morpholine-4-carbaldehyde was synthesized in 100% yield with 99% selectivity according to the general procedure for the *N*-formylation of amines using DUT-5-CoH (0.5 mol% of Co), morpholine (32  $\mu\text{L}$ , 0.375 mmol), 106  $\mu\text{L}$  Phenyl silane and 10 bar  $\text{CO}_2$  at 25  $^\circ\text{C}$  for 20 h.  $^1\text{H}$  NMR ( $\text{CDCl}_3$ ),  $\delta(\text{ppm})$ : 7.84 (s, 1 H), 3.49 (t,  $^3J_{\text{H-H}} = 4.8$  Hz, 2 H), 3.44 (t,  $^3J_{\text{H-H}} = 4.8$  Hz, 2 H), 3.35 (t,  $^3J_{\text{H-H}} = 4.8$  Hz, 2 H), 3.21 (t,  $^3J_{\text{H-H}} = 4.8$  Hz, 2 H).

#### **4-Methylpiperazine-1-carbaldehyde<sup>7</sup>**

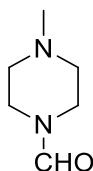

4-methylpiperazine-1-carbaldehyde was synthesized in 100% yield with 99% selectivity according to the general procedure for the *N*-formylation of amines using DUT-5-CoH (0.5 mol% of Co), 1-methylpiperazine (42  $\mu\text{L}$ , 0.375 mmol), 106  $\mu\text{L}$  Phenyl silane and 10 bar  $\text{CO}_2$  at 25  $^\circ\text{C}$  for 20 h.  $^1\text{H}$  NMR ( $\text{CDCl}_3$ ),  $\delta(\text{ppm})$ : 8.00 (s, 1 H), 3.55 (t, 2 H), 3.44 – 3.32 (m, 2 H), 2.37 (dt, 4 H), 2.30 (s, 3 H).



### ***N*-isobutylformamide**

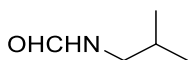

*N*-isobutylformamide was synthesized in 100% yield with 92% selectivity according to the general procedure for the *N*-formylation of amines using DUT-5-CoH (0.5 mol% of Co), isobutylamine (37  $\mu$ L, 0.375 mmol), 106  $\mu$ L Phenyl silane and 10 bar CO<sub>2</sub> at 25 °C for 20 h. <sup>1</sup>H NMR (CDCl<sub>3</sub>),  $\delta$ (ppm):

### ***N*-isopropylformamide**

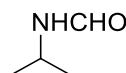

*N*-isopropylformamide was synthesized in 100% yield with 99% selectivity according to the general procedure for the *N*-formylation of amines using DUT-5-CoH (0.5 mol% of Co), isopropylamine (31  $\mu$ L, 0.375 mmol), 106  $\mu$ L Phenyl silane and 10 bar CO<sub>2</sub> at 25 °C for 20 h. <sup>1</sup>H NMR (CDCl<sub>3</sub>),  $\delta$ (ppm):

### **Indoline-1-carbaldehyde<sup>9</sup>**

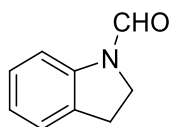

indoline-1-carbaldehyde was synthesized in 75% yield with 62% selectivity according to the general procedure for the *N*-formylation of amines using DUT-5-CoH (0.5 mol% of Co), indoline (42  $\mu$ L, 0.375 mmol), 106  $\mu$ L Phenyl silane and 10 bar CO<sub>2</sub> at 100 °C for 20 h. <sup>1</sup>H NMR (CDCl<sub>3</sub>),  $\delta$ (ppm): 8.94 (s, 1 H), 7.04-7.26 (m, 4 H), 4.07 (t, <sup>3</sup>J<sub>H-H</sub> = 8.5 Hz, 2 H), 3.16 (t, <sup>3</sup>J<sub>H-H</sub> = 8.5 Hz, 2 H)

### ***N*-(furan-2-ylmethyl)formamide<sup>10</sup>**

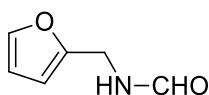

*N*-(furan-2-ylmethyl)formamide was synthesized in 100% yield with 71% selectivity according to the general procedure for the *N*-formylation of amines using DUT-5-CoH (0.5 mol% of Co), furfurylamine (30  $\mu$ L, 0.375 mmol), 106  $\mu$ L Phenyl silane and 10 bar CO<sub>2</sub> at 100 °C for 20 h. <sup>1</sup>H NMR (CDCl<sub>3</sub>),  $\delta$ (ppm): 8.12 (s, 1 H), 7.31 (m, 1 H), 6.25 (m, 3 H), 4.45 (s, 1 H), 4.28 (s, 1 H).

### ***N*-(4-methoxyphenyl)formamide<sup>3</sup>**

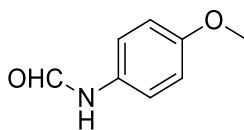

*N*-(4-methoxyphenyl)formamide was synthesized in 100% yield with 99% selectivity according to the general procedure for the *N*-formylation of amines using DUT-5-CoH (0.5 mol% of Co), *p*-anisidine (43  $\mu$ L, 0.375 mmol), 10 bar H<sub>2</sub> and 10 bar CO<sub>2</sub> at 100 °C for 40 h. <sup>1</sup>H NMR (CDCl<sub>3</sub>),  $\delta$ (ppm): 10.04 (br, 1 H), 8.19 (d, <sup>3</sup>*J*<sub>H-H</sub> = 1.95 Hz, 1 H), 7.50 (d, <sup>3</sup>*J*<sub>H-H</sub> = 9.03 Hz, 2 H), 6.88 (d, <sup>3</sup>*J*<sub>H-H</sub> = 9.06 Hz, 2 H), 3.71 (s, 3 H)

### ***N*-*p*-tolylformamide<sup>3</sup>**

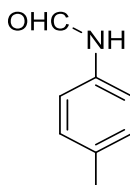

*N*-*p*-tolylformamide was synthesized in 100% conversion with 72% selectivity according to the general procedure for the *N*-formylation of amines using DUT-5-CoH (0.5 mol% of Co), *p*-toluidine (41  $\mu$ L, 0.375 mmol), 10 bar H<sub>2</sub> and 10 bar CO<sub>2</sub> at 100 °C for 40 h. <sup>1</sup>H NMR (CDCl<sub>3</sub>),  $\delta$ (ppm): 8.55 (d, <sup>3</sup>*J*<sub>H-H</sub> = 11.4 Hz, 1 H), 8.07 (br, 1 H), 7.35 (d, <sup>3</sup>*J*<sub>H-H</sub> = 8.4 Hz, 2 H), 6.91 (d, <sup>3</sup>*J*<sub>H-H</sub> = 8.3 Hz, 2 H), 2.26 (s, 3 H).

### ***N*-*tert*-butylformamide.<sup>11</sup>**

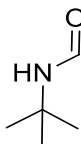

*N*-*tert*-butylformamide was synthesized in 100% yield with 87% selectivity according to the general procedure for the *N*-formylation of amines using DUT-5-CoH (0.5 mol% of Co), 2-methylpropan-2-amine (39  $\mu$ L, 0.375 mmol), 106  $\mu$ L Phenyl silane and 10 bar CO<sub>2</sub> at 25 °C for 20 h. <sup>1</sup>H NMR (CDCl<sub>3</sub>),  $\delta$ (ppm): 8.24 (d, 1 H, <sup>3</sup>*J*<sub>H-H</sub> = 12.4 Hz), 7.51 (brs, 1 H), 1.37 (s, 9 H).

### ***N*-Formyl-2,4,6-trimethylaniline.<sup>12</sup>**

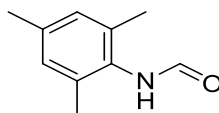

*N*-Formyl-2,4,6-trimethylaniline was synthesized in 100% yield with 40% selectivity according to the general procedure for the *N*-formylation of amines using DUT-5-CoH (0.5 mol% of Co), 2,4,6-trimethylaniline (52  $\mu$ L, 0.375 mmol), 10 bar H<sub>2</sub> and 10 bar CO<sub>2</sub> at 100 °C for 40 h. <sup>1</sup>H NMR (CDCl<sub>3</sub>),  $\delta$ (ppm): 8.39–8.03 (m, 1 H, CHO), 7.26–6.91 (m, 2H), 6.75 (broad s, 1 H, NH), 2.29–2.21 (m, 9H); 8.39–8.03 (m, 1 H), 7.26–6.91 (m, 2 H), 6.75 (broad s, 1 H), 2.29–2.21 (m, 9 H).



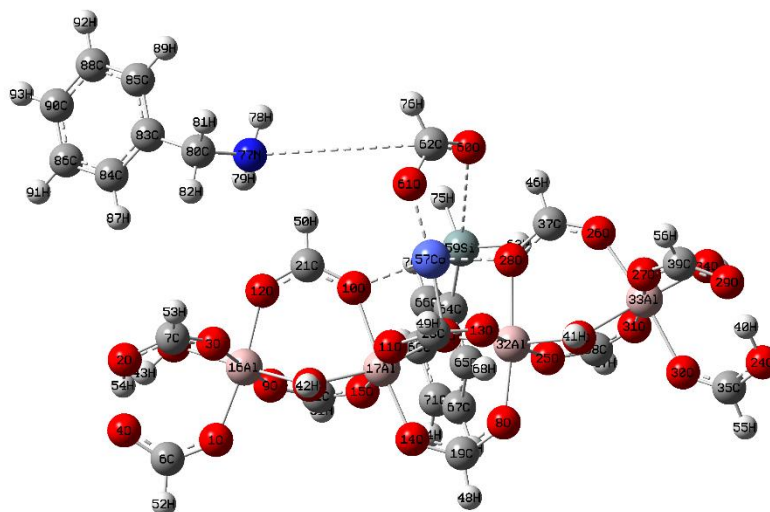

**TS-2**

**Figure S10.** DFT-optimized structures of intermediates and transition states of the catalytic cycle in the proposed DUT-5-Co-catalyzed N-formylation of benzylamine.

**Cartesian coordinates of DUT-5-CoH**

| S.No. | Atoms | X         | Y         | Z         |
|-------|-------|-----------|-----------|-----------|
| 1     | O     | 23.319438 | 12.268251 | 17.495488 |
| 2     | O     | 20.453957 | 10.982861 | 19.188515 |
| 3     | O     | 21.168411 | 13.120943 | 19.041482 |
| 4     | O     | 22.064300 | 10.436492 | 17.187536 |
| 5     | O     | 20.877464 | 12.655697 | 16.361554 |
| 6     | C     | 23.165787 | 11.019724 | 17.328150 |
| 7     | C     | 20.530048 | 12.211665 | 19.578564 |
| 8     | O     | 26.283710 | 18.351115 | 19.347890 |
| 9     | O     | 22.940871 | 14.333228 | 15.828435 |
| 10    | O     | 21.749063 | 17.001247 | 17.684796 |
| 11    | O     | 23.210770 | 16.710230 | 20.169471 |
| 12    | O     | 20.723885 | 15.059633 | 17.251512 |
| 13    | O     | 23.900483 | 18.782372 | 20.731556 |
| 14    | O     | 25.580014 | 16.273207 | 18.786077 |
| 15    | O     | 24.190005 | 16.106385 | 16.433502 |
| 16    | Al    | 22.119407 | 13.747129 | 17.424833 |
| 17    | Al    | 23.756035 | 16.563609 | 18.269648 |
| 18    | O     | 23.877033 | 18.309594 | 18.028682 |
| 19    | C     | 26.442759 | 17.119114 | 19.156911 |
| 20    | O     | 23.195984 | 14.781673 | 18.515061 |
| 21    | C     | 20.736276 | 16.310896 | 17.386579 |
| 22    | C     | 23.795752 | 15.244508 | 15.619519 |
| 23    | C     | 23.358361 | 17.675580 | 20.970943 |
| 24    | O     | 27.935769 | 24.303806 | 21.763422 |
| 25    | O     | 25.635252 | 20.346411 | 17.570777 |
| 26    | O     | 23.297511 | 22.621092 | 19.498421 |
| 27    | O     | 24.699633 | 22.730863 | 21.830642 |
| 28    | O     | 22.991093 | 20.570517 | 18.645541 |
| 29    | O     | 25.805888 | 24.267225 | 23.059383 |
| 30    | O     | 27.249472 | 22.676728 | 20.355817 |
| 31    | O     | 25.734577 | 22.533638 | 18.109242 |
| 32    | Al    | 24.738284 | 19.494970 | 19.041395 |
| 33    | Al    | 25.236869 | 22.745796 | 19.994282 |
| 34    | O     | 25.258679 | 24.519309 | 19.862523 |
| 35    | C     | 28.103687 | 23.423624 | 20.840330 |
| 36    | O     | 25.301822 | 20.855218 | 20.168215 |
| 37    | C     | 22.589811 | 21.732296 | 18.998648 |
| 38    | C     | 25.926128 | 21.552132 | 17.351781 |
| 39    | C     | 24.879604 | 23.466704 | 22.852322 |
| 40    | H     | 26.976457 | 24.295734 | 22.187709 |
| 41    | H     | 25.148591 | 20.625990 | 21.091087 |
| 42    | H     | 23.081634 | 14.612428 | 19.456998 |
| 43    | H     | 21.111071 | 11.704591 | 16.301894 |
| 44    | H     | 20.530773 | 12.981870 | 15.522935 |
| 45    | H     | 25.530449 | 24.827564 | 18.995656 |
| 46    | H     | 21.527252 | 21.939069 | 18.827343 |
| 47    | H     | 26.391906 | 21.765425 | 16.380472 |
| 48    | H     | 27.449404 | 16.724162 | 19.341415 |
| 49    | H     | 22.968858 | 17.525479 | 21.986593 |
| 50    | H     | 19.796321 | 16.848038 | 17.229513 |
| 51    | H     | 24.223886 | 15.276346 | 14.611383 |
| 52    | H     | 24.087635 | 10.424315 | 17.309205 |
| 53    | H     | 19.955147 | 12.410631 | 20.484634 |
| 54    | H     | 21.025177 | 10.782203 | 18.380883 |

|    |    |           |           |           |
|----|----|-----------|-----------|-----------|
| 55 | H  | 29.138128 | 23.362732 | 20.484876 |
| 56 | H  | 24.119401 | 23.354408 | 23.641962 |
| 57 | Co | 22.042075 | 18.977837 | 17.911091 |
| 58 | H  | 20.746920 | 19.532208 | 17.527887 |

|    |   |           |           |           |
|----|---|-----------|-----------|-----------|
| 61 | O | 19.855565 | 20.223887 | 16.281016 |
|----|---|-----------|-----------|-----------|

**Cartesian coordinates of DUT-5-Co(OCHO)  
(INT-1)**

**Cartesian coordinates of TS-1**

| S.No. | Atoms | Coordinates (Angstroms) |           |           |
|-------|-------|-------------------------|-----------|-----------|
|       |       | X                       | Y         | Z         |
| 1     | O     | 23.252696               | 12.293904 | 17.449888 |
| 2     | O     | 20.429230               | 10.957190 | 19.173820 |
| 3     | O     | 21.141240               | 13.098544 | 19.072277 |
| 4     | O     | 21.983441               | 10.476912 | 17.114935 |
| 5     | O     | 20.785088               | 12.723862 | 16.385315 |
| 6     | C     | 23.090359               | 11.051547 | 17.245786 |
| 7     | C     | 20.516848               | 12.172941 | 19.598747 |
| 8     | O     | 26.287394               | 18.326934 | 19.416129 |
| 9     | O     | 22.836847               | 14.416298 | 15.866088 |
| 10    | O     | 21.723303               | 17.022023 | 17.724160 |
| 11    | O     | 23.243293               | 16.669553 | 20.239707 |
| 12    | O     | 20.653804               | 15.095601 | 17.366504 |
| 13    | O     | 23.907817               | 18.753336 | 20.792527 |
| 14    | O     | 25.606559               | 16.242407 | 18.849481 |
| 15    | O     | 24.198395               | 16.089919 | 16.506593 |
| 16    | Al    | 22.053555               | 13.772698 | 17.457651 |
| 17    | Al    | 23.789506               | 16.518356 | 18.344479 |
| 18    | O     | 23.870185               | 18.265510 | 18.112788 |
| 19    | C     | 26.460926               | 17.097544 | 19.223450 |
| 20    | O     | 23.159226               | 14.767155 | 18.563942 |
| 21    | C     | 20.680698               | 16.345223 | 17.490199 |
| 22    | C     | 23.733156               | 15.288940 | 15.667336 |
| 23    | C     | 23.385796               | 17.638452 | 21.039013 |
| 24    | O     | 27.838697               | 24.365984 | 21.738886 |
| 25    | O     | 25.625918               | 20.292869 | 17.624538 |
| 26    | O     | 23.232047               | 22.581185 | 19.469857 |
| 27    | O     | 24.618208               | 22.752770 | 21.814473 |
| 28    | O     | 22.958118               | 20.507638 | 18.674666 |
| 29    | O     | 25.700854               | 24.320848 | 23.023102 |
| 30    | O     | 27.179264               | 22.706356 | 20.357359 |
| 31    | O     | 25.674425               | 22.494045 | 18.108260 |
| 32    | Al    | 24.743049               | 19.463467 | 19.104223 |
| 33    | Al    | 25.173677               | 22.742716 | 19.984499 |
| 34    | O     | 25.167419               | 24.512487 | 19.818848 |
| 35    | C     | 28.021397               | 23.475207 | 20.829312 |
| 36    | O     | 25.261198               | 20.853984 | 20.205322 |
| 37    | C     | 22.537121               | 21.679215 | 18.982413 |
| 38    | C     | 25.887502               | 21.499021 | 17.373802 |
| 39    | C     | 24.783282               | 23.508856 | 22.824303 |
| 40    | H     | 26.878567               | 24.350251 | 22.160205 |
| 41    | H     | 25.100075               | 20.647125 | 21.132246 |
| 42    | H     | 23.037121               | 14.585394 | 19.502914 |
| 43    | H     | 21.013622               | 11.774121 | 16.291805 |
| 44    | H     | 20.426713               | 13.076438 | 15.562278 |
| 45    | H     | 25.412174               | 24.808572 | 18.939752 |
| 46    | H     | 21.477813               | 21.871176 | 18.780111 |
| 47    | H     | 26.345687               | 21.698435 | 16.396463 |
| 48    | H     | 27.470644               | 16.712288 | 19.407930 |
| 49    | H     | 23.009525               | 17.483449 | 22.058546 |
| 50    | H     | 19.739486               | 16.892179 | 17.383918 |
| 51    | H     | 24.131472               | 15.345553 | 14.648652 |
| 52    | H     | 24.009364               | 10.454917 | 17.183380 |
| 53    | H     | 19.966630               | 12.344915 | 20.525346 |
| 54    | H     | 20.978574               | 10.780718 | 18.345370 |
| 55    | H     | 29.056289               | 23.426095 | 20.473801 |
| 56    | H     | 24.018019               | 23.403794 | 23.609904 |
| 57    | Co    | 22.051687               | 18.909856 | 18.050397 |
| 58    | H     | 20.704478               | 19.387119 | 18.004058 |
| 59    | O     | 22.064411               | 19.513165 | 16.330255 |
| 60    | C     | 20.956318               | 19.866766 | 16.322221 |
| 1     | O     | 23.319438               | 12.268251 | 17.495488 |
| 2     | O     | 20.453957               | 10.982861 | 19.188515 |
| 3     | O     | 21.168411               | 13.120943 | 19.041482 |
| 4     | O     | 22.064300               | 10.436492 | 17.187536 |
| 5     | O     | 20.877464               | 12.655697 | 16.361554 |
| 6     | C     | 23.165787               | 11.019724 | 17.328150 |
| 7     | C     | 20.530048               | 12.211665 | 19.578564 |
| 8     | O     | 26.283710               | 18.351115 | 19.347890 |
| 9     | O     | 22.940871               | 14.333228 | 15.828435 |
| 10    | O     | 21.749063               | 17.001247 | 17.684796 |
| 11    | O     | 23.210770               | 16.710230 | 20.169471 |
| 12    | O     | 20.723885               | 15.059633 | 17.251512 |
| 13    | O     | 23.900483               | 18.782372 | 20.731556 |
| 14    | O     | 25.580014               | 16.273207 | 18.786077 |
| 15    | O     | 24.190005               | 16.106385 | 16.433502 |
| 16    | Al    | 22.119407               | 13.747129 | 17.424833 |
| 17    | Al    | 23.756035               | 16.563609 | 18.269648 |
| 18    | O     | 23.877033               | 18.309594 | 18.028682 |
| 19    | C     | 26.442759               | 17.119114 | 19.156911 |
| 20    | O     | 23.195984               | 14.781673 | 18.515061 |
| 21    | C     | 20.736276               | 16.310896 | 17.386579 |
| 22    | C     | 23.795752               | 15.244508 | 15.619519 |
| 23    | C     | 23.358361               | 17.675580 | 20.970943 |
| 24    | O     | 27.935769               | 24.303806 | 21.763422 |
| 25    | O     | 25.635252               | 20.346411 | 17.570777 |
| 26    | O     | 23.297511               | 22.621092 | 19.498421 |
| 27    | O     | 24.699633               | 22.730863 | 21.830642 |
| 28    | O     | 22.991093               | 20.570517 | 18.645541 |
| 29    | O     | 25.805888               | 24.267225 | 23.059383 |
| 30    | O     | 27.249472               | 22.676728 | 20.355817 |
| 31    | O     | 25.734577               | 22.533638 | 18.109242 |
| 32    | Al    | 24.738284               | 19.494970 | 19.041395 |
| 33    | Al    | 25.236869               | 22.745796 | 19.994282 |
| 34    | O     | 25.258679               | 24.519309 | 19.862523 |
| 35    | C     | 28.103687               | 23.423624 | 20.840330 |
| 36    | O     | 25.301822               | 20.855218 | 20.168215 |
| 37    | C     | 22.589811               | 21.732296 | 18.998648 |
| 38    | C     | 25.926128               | 21.552132 | 17.351781 |
| 39    | C     | 24.879604               | 23.466704 | 22.852322 |
| 40    | H     | 26.976457               | 24.295734 | 22.187709 |
| 41    | H     | 25.148591               | 20.625990 | 21.091087 |
| 42    | H     | 23.081634               | 14.612428 | 19.456998 |
| 43    | H     | 21.111071               | 11.704591 | 16.301894 |
| 44    | H     | 20.530773               | 12.981870 | 15.522935 |
| 45    | H     | 25.530449               | 24.827564 | 18.995656 |
| 46    | H     | 21.527252               | 21.939069 | 18.827343 |
| 47    | H     | 26.391906               | 21.765425 | 16.380472 |
| 48    | H     | 27.449404               | 16.724162 | 19.341415 |
| 49    | H     | 22.968858               | 17.525479 | 21.986593 |
| 50    | H     | 19.796321               | 16.848038 | 17.229513 |
| 51    | H     | 24.223886               | 15.276346 | 14.611383 |
| 52    | H     | 24.087635               | 10.424315 | 17.309205 |
| 53    | H     | 19.955147               | 12.410631 | 20.484634 |
| 54    | H     | 21.025177               | 10.782203 | 18.380883 |
| 55    | H     | 29.138128               | 23.362732 | 20.484876 |
| 56    | H     | 24.119401               | 23.354408 | 23.641962 |
| 57    | Co    | 22.042075               | 18.977837 | 17.911091 |
| 58    | O     | 20.427566               | 19.668903 | 17.433398 |
| 59    | C     | 20.535682               | 20.062968 | 16.037890 |
| 60    | H     | 21.358407               | 20.054109 | 15.353826 |
| 61    | O     | 19.241962               | 20.481239 | 15.594903 |

## Cartesian coordinates of INT-2

| S.No. | Atoms | Coordinates (Angstroms) |           |           |
|-------|-------|-------------------------|-----------|-----------|
|       |       | X                       | Y         | Z         |
| 1     | O     | 23.373595               | 12.576824 | 16.879202 |
| 2     | O     | 20.805526               | 10.929117 | 18.764209 |
| 3     | O     | 21.408686               | 13.104699 | 18.788057 |
| 4     | O     | 22.169977               | 10.717338 | 16.534477 |
| 5     | O     | 20.772597               | 12.934467 | 16.137071 |
| 6     | C     | 23.253258               | 11.345834 | 16.590473 |
| 7     | C     | 20.879357               | 12.106397 | 19.286657 |
| 8     | O     | 26.256762               | 18.622088 | 18.990952 |
| 9     | O     | 22.645816               | 14.794895 | 15.553734 |
| 10    | O     | 21.627569               | 17.152737 | 17.760958 |
| 11    | O     | 23.414097               | 16.716608 | 20.034613 |
| 12    | O     | 20.626657               | 15.199607 | 17.347810 |
| 13    | O     | 24.075761               | 18.766177 | 20.706929 |
| 14    | O     | 25.595871               | 16.563769 | 18.329748 |
| 15    | O     | 23.922284               | 16.538216 | 16.182422 |
| 16    | Al    | 22.101062               | 13.960472 | 17.156849 |
| 17    | Al    | 23.718025               | 16.757614 | 18.085363 |
| 18    | O     | 23.681179               | 18.540968 | 18.026883 |
| 19    | C     | 26.457458               | 17.426322 | 18.664874 |
| 20    | O     | 23.263623               | 14.942251 | 18.213469 |
| 21    | C     | 20.601248               | 16.429098 | 17.585758 |
| 22    | C     | 23.434721               | 15.761139 | 15.333053 |
| 23    | C     | 23.623364               | 17.611828 | 20.903000 |
| 24    | O     | 27.864724               | 24.446188 | 21.784637 |
| 25    | O     | 25.279899               | 20.706187 | 17.524917 |
| 26    | O     | 23.105756               | 22.666140 | 19.892549 |
| 27    | O     | 24.762920               | 22.669673 | 22.056202 |
| 28    | O     | 22.800940               | 20.673675 | 18.917214 |
| 29    | O     | 25.889763               | 24.192272 | 23.280306 |
| 30    | O     | 27.128653               | 22.887275 | 20.326083 |
| 31    | O     | 25.376263               | 22.838125 | 18.250526 |
| 32    | Al    | 24.645126               | 19.697793 | 19.014079 |
| 33    | Al    | 25.104046               | 22.875284 | 20.187317 |
| 34    | O     | 25.004454               | 24.648115 | 20.207303 |
| 35    | C     | 27.987315               | 23.647033 | 20.785906 |
| 36    | O     | 25.265295               | 20.979519 | 20.186610 |
| 37    | C     | 22.384239               | 21.785971 | 19.410103 |
| 38    | C     | 25.499455               | 21.938969 | 17.384810 |
| 39    | C     | 25.001068               | 23.342940 | 23.109609 |
| 40    | H     | 26.953906               | 24.351329 | 22.299342 |
| 41    | H     | 25.232757               | 20.668108 | 21.097680 |
| 42    | H     | 23.288939               | 14.663446 | 19.135883 |
| 43    | H     | 21.037893               | 12.012200 | 15.933108 |
| 44    | H     | 20.310420               | 13.333124 | 15.390168 |
| 45    | H     | 25.110621               | 25.043940 | 19.339942 |
| 46    | H     | 21.300364               | 21.940922 | 19.382294 |
| 47    | H     | 25.826697               | 22.257824 | 16.387055 |
| 48    | H     | 27.498096               | 17.082394 | 18.679039 |
| 49    | H     | 23.380417               | 17.345246 | 21.939694 |
| 50    | H     | 19.626105               | 16.920300 | 17.642506 |
| 51    | H     | 23.705605               | 15.933488 | 14.286365 |
| 52    | H     | 24.188581               | 10.813472 | 16.376160 |
| 53    | H     | 20.415562               | 12.171118 | 20.272150 |
| 54    | H     | 21.279371               | 10.855699 | 17.875310 |
| 55    | H     | 28.984062               | 23.668404 | 20.332657 |
| 56    | H     | 24.338572               | 23.119762 | 23.960855 |
| 57    | Co    | 21.884630               | 19.093362 | 18.149864 |
| 58    | H     | 21.757771               | 19.615025 | 16.308225 |
| 59    | Si    | 21.072569               | 20.201060 | 15.163544 |
| 60    | O     | 19.382387               | 20.396278 | 16.605098 |
| 61    | O     | 20.087971               | 19.522681 | 18.630921 |
| 62    | C     | 19.160262               | 20.062956 | 17.922164 |
| 63    | H     | 18.213948               | 20.191913 | 18.480319 |
| 64    | H     | 20.814387               | 21.645215 | 15.333845 |
| 65    | C     | 22.479943               | 20.033359 | 13.910195 |
| 66    | C     | 23.551555               | 20.942095 | 13.892354 |
| 67    | C     | 22.490501               | 18.993623 | 12.967805 |
| 68    | C     | 24.595174               | 20.812633 | 12.978446 |
| 69    | H     | 23.567756               | 21.768608 | 14.596210 |

|    |   |           |           |           |
|----|---|-----------|-----------|-----------|
| 70 | C | 23.531707 | 18.857955 | 12.048993 |
| 71 | H | 21.669511 | 18.282988 | 12.941354 |
| 72 | C | 24.588034 | 19.766899 | 12.054961 |
| 73 | H | 25.411814 | 21.526250 | 12.983077 |
| 74 | H | 23.514830 | 18.049310 | 11.326282 |
| 75 | H | 25.398893 | 19.665210 | 11.342288 |
| 76 | H | 19.952548 | 19.387964 | 14.645674 |

## Cartesian coordinates of TS-2

| S.No. | Atoms | Coordinates (Angstroms) |           |           |
|-------|-------|-------------------------|-----------|-----------|
|       |       | X                       | Y         | Z         |
| 1     | O     | 23.373595               | 12.576824 | 16.879202 |
| 2     | O     | 20.805526               | 10.929117 | 18.764209 |
| 3     | O     | 21.408686               | 13.104699 | 18.788057 |
| 4     | O     | 22.169977               | 10.717338 | 16.534477 |
| 5     | O     | 20.772597               | 12.934467 | 16.137071 |
| 6     | C     | 23.253258               | 11.345834 | 16.590473 |
| 7     | C     | 20.879357               | 12.106397 | 19.286657 |
| 8     | O     | 26.256762               | 18.622088 | 18.990952 |
| 9     | O     | 22.645816               | 14.794895 | 15.553734 |
| 10    | O     | 21.627569               | 17.152737 | 17.760958 |
| 11    | O     | 23.414097               | 16.716608 | 20.034613 |
| 12    | O     | 20.626657               | 15.199607 | 17.347810 |
| 13    | O     | 24.075761               | 18.766177 | 20.706929 |
| 14    | O     | 25.595871               | 16.563769 | 18.329748 |
| 15    | O     | 23.922284               | 16.538216 | 16.182422 |
| 16    | Al    | 22.101062               | 13.960472 | 17.156849 |
| 17    | Al    | 23.718025               | 16.757614 | 18.085363 |
| 18    | O     | 23.681179               | 18.540968 | 18.026883 |
| 19    | C     | 26.457458               | 17.426322 | 18.664874 |
| 20    | O     | 23.263623               | 14.942251 | 18.213469 |
| 21    | C     | 20.601248               | 16.429098 | 17.585758 |
| 22    | C     | 23.434721               | 15.761139 | 15.333053 |
| 23    | C     | 23.623364               | 17.611828 | 20.903000 |
| 24    | O     | 27.864724               | 24.446188 | 21.784637 |
| 25    | O     | 25.279899               | 20.706187 | 17.524917 |
| 26    | O     | 23.105756               | 22.666140 | 19.892549 |
| 27    | O     | 24.762920               | 22.669673 | 22.056202 |
| 28    | O     | 22.800940               | 20.673675 | 18.917214 |
| 29    | O     | 25.889763               | 24.192272 | 23.280306 |
| 30    | O     | 27.128653               | 22.887275 | 20.326083 |
| 31    | O     | 25.376263               | 22.838125 | 18.250526 |
| 32    | Al    | 24.645126               | 19.697793 | 19.014079 |
| 33    | Al    | 25.104046               | 22.875284 | 20.187317 |
| 34    | O     | 25.004454               | 24.648115 | 20.207303 |
| 35    | C     | 27.987315               | 23.647033 | 20.785906 |
| 36    | O     | 25.265295               | 20.979519 | 20.186610 |
| 37    | C     | 22.384239               | 21.785971 | 19.410103 |
| 38    | C     | 25.499455               | 21.938969 | 17.384810 |
| 39    | C     | 25.001068               | 23.342940 | 23.109609 |
| 40    | H     | 26.953906               | 24.351329 | 22.299342 |
| 41    | H     | 25.232757               | 20.668108 | 21.097680 |
| 42    | H     | 23.288939               | 14.663446 | 19.135883 |
| 43    | H     | 21.037893               | 12.012200 | 15.933108 |
| 44    | H     | 20.310420               | 13.333124 | 15.390168 |
| 45    | H     | 25.110621               | 25.043940 | 19.339942 |
| 46    | H     | 21.300364               | 21.940922 | 19.382294 |
| 47    | H     | 25.826697               | 22.257824 | 16.387055 |
| 48    | H     | 27.498096               | 17.082394 | 18.679039 |
| 49    | H     | 23.380417               | 17.345246 | 21.939694 |
| 50    | H     | 19.626105               | 16.920300 | 17.642506 |
| 51    | H     | 23.705605               | 15.933488 | 14.286365 |
| 52    | H     | 24.188581               | 10.813472 | 16.376160 |
| 53    | H     | 20.415562               | 12.171118 | 20.272150 |
| 54    | H     | 21.279371               | 10.855699 | 17.875310 |
| 55    | H     | 28.984062               | 23.668404 | 20.332657 |
| 56    | H     | 24.338572               | 23.119762 | 23.960855 |
| 57    | Co    | 21.884630               | 19.093362 | 18.149864 |
| 58    | H     | 21.757771               | 19.615025 | 16.308225 |
| 59    | Si    | 21.072569               | 20.201060 | 15.163544 |
| 60    | O     | 19.382387               | 20.396278 | 16.605098 |
| 61    | O     | 20.087971               | 19.522681 | 18.630921 |
| 62    | C     | 19.160262               | 20.062956 | 17.922164 |
| 63    | H     | 18.213948               | 20.191913 | 18.480319 |
| 64    | H     | 20.814387               | 21.645215 | 15.333845 |
| 65    | C     | 22.479943               | 20.033359 | 13.910195 |
| 66    | C     | 23.551555               | 20.942095 | 13.892354 |
| 67    | C     | 22.490501               | 18.993623 | 12.967805 |
| 68    | C     | 24.595174               | 20.812633 | 12.978446 |
| 69    | H     | 23.567756               | 21.768608 | 14.596210 |
| 70    | C     | 23.531707               | 18.857955 | 12.048993 |
| 71    | H     | 21.669511               | 18.282988 | 12.941354 |
| 72    | C     | 24.588034               | 19.766899 | 12.054961 |
| 73    | H     | 25.411814               | 21.526250 | 12.983077 |
| 74    | H     | 23.514830               | 18.049310 | 11.326282 |
| 75    | H     | 25.398893               | 19.665210 | 11.342288 |
| 76    | H     | 19.952548               | 19.387964 | 14.645674 |

|    |   |           |           |           |    |   |           |           |           |
|----|---|-----------|-----------|-----------|----|---|-----------|-----------|-----------|
| 61 | O | 20.087971 | 19.522681 | 18.630921 | 79 | H | 18.319000 | 18.216297 | 17.770415 |
| 62 | C | 19.160262 | 20.062956 | 17.922164 | 80 | C | 17.279235 | 19.256560 | 19.176701 |
| 63 | H | 20.624904 | 21.667101 | 15.495454 | 81 | H | 17.283975 | 20.273162 | 19.510463 |
| 64 | C | 22.290461 | 20.055245 | 14.071804 | 82 | H | 17.757297 | 18.638841 | 19.907987 |
| 65 | C | 23.362073 | 20.963980 | 14.053963 | 83 | C | 15.825623 | 18.787682 | 18.979807 |
| 66 | C | 22.301019 | 19.015509 | 13.129414 | 84 | C | 15.299575 | 17.785192 | 19.795135 |
| 67 | C | 24.405692 | 20.834519 | 13.140055 | 85 | C | 15.034907 | 19.365266 | 17.986473 |
| 68 | H | 23.378274 | 21.790493 | 14.757819 | 86 | C | 13.983310 | 17.359973 | 19.616654 |
| 69 | C | 23.342224 | 18.879840 | 12.210602 | 87 | H | 15.923460 | 17.329499 | 20.577664 |
| 70 | H | 21.480029 | 18.304874 | 13.102963 | 88 | C | 13.717911 | 18.940720 | 17.808456 |
| 71 | C | 24.398551 | 19.788784 | 12.216570 | 89 | H | 15.449300 | 20.155521 | 17.343896 |
| 72 | H | 25.222332 | 21.548135 | 13.144686 | 90 | C | 13.192070 | 17.938144 | 18.623238 |
| 73 | H | 23.325348 | 18.071195 | 11.487891 | 91 | H | 13.568801 | 16.569366 | 20.258852 |
| 74 | H | 25.209411 | 19.687095 | 11.503897 | 92 | H | 13.094572 | 19.396589 | 17.025445 |
| 75 | H | 19.763066 | 19.409850 | 14.807283 | 93 | H | 12.154251 | 17.602751 | 18.482738 |
| 76 | H | 18.865841 | 20.978425 | 18.391349 |    |   |           |           |           |
| 77 | N | 18.003486 | 19.156128 | 17.901446 |    |   |           |           |           |
| 78 | H | 17.393736 | 19.410746 | 17.150864 |    |   |           |           |           |

**9.1. X-ray absorption spectroscopic analysis.** X-ray Near Edge Structure (XANES) and Extended X-ray Absorption Fine Structure (EXAFS) measurements have been carried out at the Energy-Scanning EXAFS beamline (BL-9) at the Indus-2 Synchrotron Source at Raja Ramanna Centre for Advanced Technology (RRCAT), Indore, India.<sup>18, 19</sup> All the measurements were performed at room temperature. This beamline operates in the energy range of 4 keV to 25 keV. The beamline optics consist of a Rh/Pt coated collimating meridional cylindrical mirror and the collimated beam reflected by the mirror is monochromatized by a Si(111) based double crystal monochromator (DCM). The second crystal of the DCM is a sagittal cylindrical crystal which is used for horizontal focusing of the beam while another Rh/Pt coated bendable post mirror facing downward is used for vertical focusing of the beam at the sample position. Two ionization chambers (300 mm length each) have been used for data collection in transmission mode; one ionization chamber for measuring incident flux, second one for measuring transmitted flux. For energy calibration, standard metal foils were used. Appropriate gas pressure and gas mixture have been chosen so as to achieve 10-20% absorption in first ionization chamber and 70-90% absorption in second ionization chamber to obtain better signal-to-noise ratio. Pellets were made from powder samples for recording absorption spectra. Sample powder was mixed homogeneously with cellulose powder in appropriate proportion and pressed (2 Ton) into a 15 mm diameter disc. The amount of the sample was estimated such that to get reasonable edge jump at particular absorption edge of the element to be probed. Spectra were collected at the cobalt K-edge in transmission mode and were calibrated against the reference spectrum of metallic cobalt (7709 eV). Data were processed using Demeter software.<sup>20</sup> A metallic cobalt foil standard was used as a reference for energy calibration and was measured simultaneously with experimental samples.

**EXAFS fitting using DFT optimized structures.** The EXAFS spectrum of DUT-5-Co-OC(O)H were calibrated against the reference spectra and aligned to the first peak in the smoothed first derivative of the absorption spectrum, the background noise was removed, and the spectra were processed to obtain a normalized unit edge step. The fitting parameters of DUT-5-Co-OC(O)H are summarized in Table S5.

**Table S5. Summary of EXAFS fitting parameters of DUT-5-Co-OC(O)H.**

| Sample                    | DUT-5-Co-OC(O)H | Fitting range                          | $k$ 2.7 – 11 Å <sup>-1</sup><br>$R$ 1 – 4 Å |
|---------------------------|-----------------|----------------------------------------|---------------------------------------------|
| <b>Independent points</b> | 13              | <b>R-factor</b>                        | 0.012                                       |
| <b>Variables</b>          | 6               | $S_0^2$                                | 1.00                                        |
| <b>Reduced chi-square</b> | 300             | $\Delta E_0$ (eV)                      | -5.30±1.21                                  |
| $R$ (Co-O18) (Å)          | 1.83±0.02       | $\sigma^2$ (Co-O18) (Å <sup>2</sup> )  | 0.001±0.001                                 |
| $R$ (Co-O28) (Å)          | 1.95±0.02       | $\sigma^2$ (Co-O28) (Å <sup>2</sup> )  | 0.001±0.001                                 |
| $R$ (Co-O10) (Å)          | 1.94±0.02       | $\sigma^2$ (Co-O10) (Å <sup>2</sup> )  | 0.001±0.001                                 |
| $R$ (Co-O58) (Å)          | 1.87±0.02       | $\sigma^2$ (Co-O58) (Å <sup>2</sup> )  | 0.001±0.001                                 |
| $R$ (Co-Al17) (Å)         | 2.93±0.04       | $\sigma^2$ (Co-Al17) (Å <sup>2</sup> ) | 0.003±0.001                                 |
| $R$ (Co-Al32) (Å)         | 2.94±0.04       | $\sigma^2$ (Co-Al32) (Å <sup>2</sup> ) | 0.003±0.001                                 |
| $R$ (Co-C29) (Å)          | 3.12±0.07       | $\sigma^2$ (Co-C29) (Å <sup>2</sup> )  | 0.006±0.002                                 |
| $R$ (Co-C23) (Å)          | 3.30±0.07       | $\sigma^2$ (Co-C23) (Å <sup>2</sup> )  | 0.006±0.002                                 |
| $R$ (Co-C59) (Å)          | 2.81±0.07       | $\sigma^2$ (Co-C59) (Å <sup>2</sup> )  | 0.006±0.002                                 |



## 9.2. XPS analysis of DUT-5-Co-OC(O)H.

All the binding energies were corrected with reference to the C1s peak at 284.8 eV. MULTIPAK software was used for peak analysis and de-convolution studies.

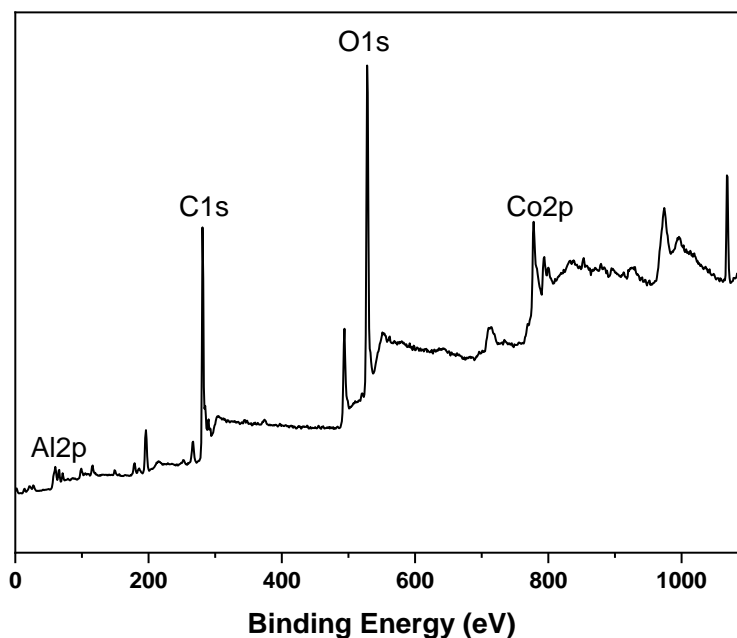

**Figure S11.** XPS data of DUT-5-Co-OC(O)H.

## 10. References.

1. N. Antil, A. Kumar, N. Akhtar, R. Newar, W. Begum and K. Manna, *Inorg. Chem.*, 2021, **60**, 9029-9039.
2. J. Casado, M. A. Lopez-Quintela and F. M. Lorenzo-Barral, *J. Chem. Educ.*, 1986, **63**, 450.
3. A. Kumar, P. Sharma, N. Sharma, Y. Kumar and D. Mahajan, *RSC Adv.*, 2021, **11**, 25777-25787.
4. K. Zhang, L. Zong and X. Jia, *Adv. Synth. Catal.*, 2021, **363**, 1335-1340.
5. Y. Shen, Q. Zheng, Z.-N. Chen, D. Wen, J. H. Clark, X. Xu and T. Tu, *Angew. Chem. Int. Ed.*, 2021, **60**, 4125-4132.
6. F. C. Pigge, J. J. Coniglio and S. Fang, *Organometallics*, 2002, **21**, 4505-4512.
7. Q. Shen, X. Chen, Y. Tan, J. Chen, L. Chen and S. Tan, *ACS Appl. Mater. Interfaces*, 2019, **11**, 38838-38848.
8. Y. Zhang, H. Zhang and K. Gao, *Org. Lett.*, 2021, **23**, 8282-8286.
9. Z. Wang, W. Wan, H. Jiang and J. Hao, *J. Org. Chem. Res.*, 2007, **72**, 9364-9367.
10. M. Rahman, D. Kundu, A. Hajra and A. Majee, *Tetrahedron Lett.*, 2010, **51**, 2896-2899.
11. L. Ma'mani, M. Sheykhani, A. Heydari, M. Faraji and Y. Yamini, *Appl. Catal. A: Gen.*, 2010, **377**, 64-69.
12. G. C. Vougioukalakis and R. H. Grubbs, *J. Am. Chem. Soc.*, 2008, **130**, 2234-2245.
13. M. Araújo, B. Lasorne, A. L. Magalhães, G. A. Worth, M. J. Bearpark and M. A. Robb, *J. Chem. Phys.*, 2009, **131**, 144301.
14. T. Vreven, K. S. Byun, I. Komáromi, S. Dapprich, J. A. Montgomery, K. Morokuma and M. J. Frisch, *J. Chem. Theory Comput.*, 2006, **2**, 815-826.
15. V. Yempally, S. J. Kyran, R. K. Raju, W. Y. Fan, E. N. Brothers, D. J. Darensbourg and A. A. Bengali, *Inorg. Chem.*, 2014, **53**, 4081-4088.

16. H. Park, E. N. Brothers and K. M. Merz, Jr., *J. Am. Chem. Soc.*, 2005, **127**, 4232-4241.
17. S. Canneaux, F. Bohr and E. Henon, *J. Comput. Chem.*, 2014, **35**, 82-93.
18. B. P. Soares, J. A. E. Desa, C. Nayak, D. Bhattacharyya and S. N. Jha, *Mater. Res. Express.*, 2019, **6**, 075202.
19. A. K. Poswal, C. B. Basak, D. V. Udupa and M. N. Deo, *AIP Conference Proceedings*, 2020, **2265**, 030203.
20. B. Ravel and M. Newville, *J. Synchrotron Radiat.*, 2005, **12**, 537-541.
